# Supplementary material for: Comparative Analysis of DNA Replication Timing Reveals Conserved Large-Scale Chromosomal Architecture
Source: PubMed Central journal article supplement (PMC2895651; doi:10.1371/journal.pgen.1001011), 2010-07-01

Mouse chromosome 1

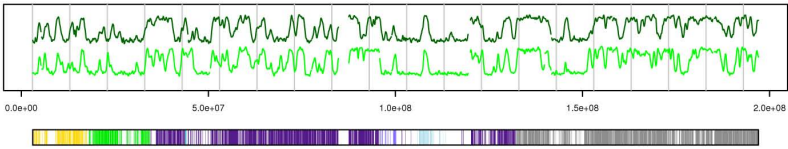

Mouse chromosome 2

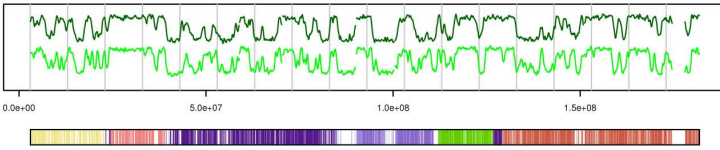

Mouse chromosome 3

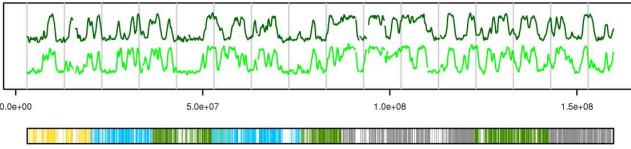

Mouse chromosome 4

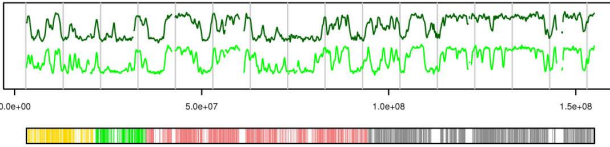

Mouse chromosome 5

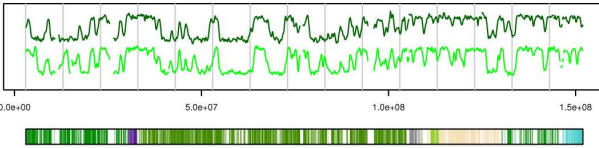

Mouse chromosome 6

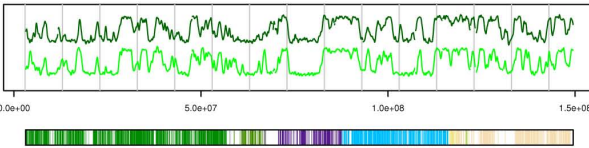

Mouse chromosome 7

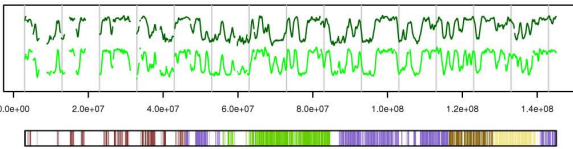

Mouse chromosome X

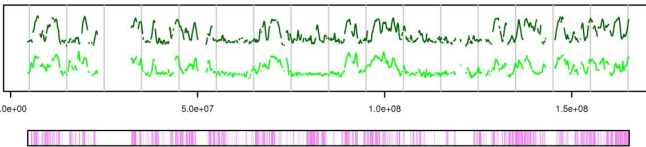

— Mouse lymphoblasts  
— Mouse fibroblasts

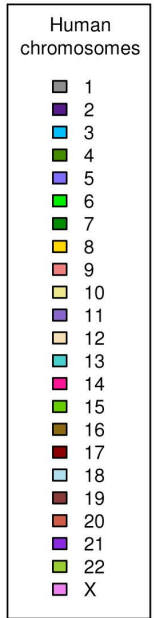

Mouse chromosome 8

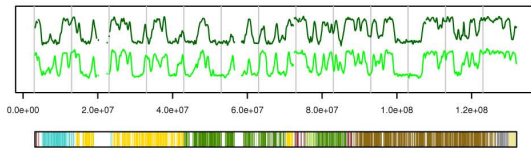

Mouse chromosome 16

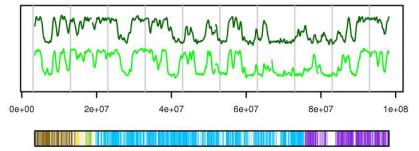

Mouse chromosome 9

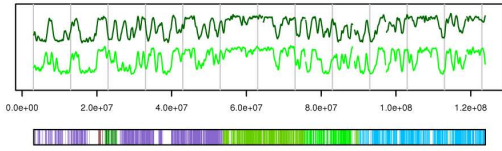

Mouse chromosome 17

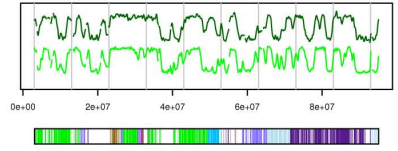

Mouse chromosome 10

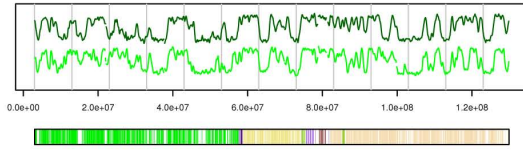

Mouse chromosome 18

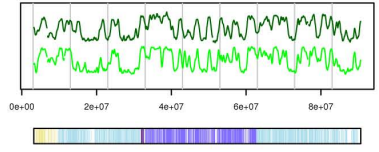

Mouse chromosome 11

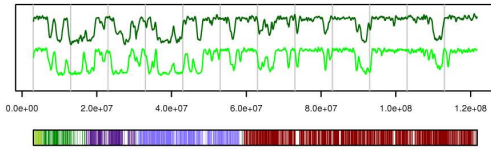

Mouse chromosome 19

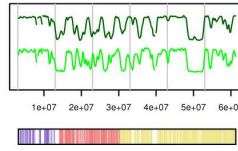

Mouse chromosome 12

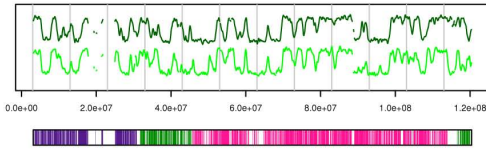

— Mouse lymphoblasts  
— Mouse fibroblasts

Mouse chromosome 13

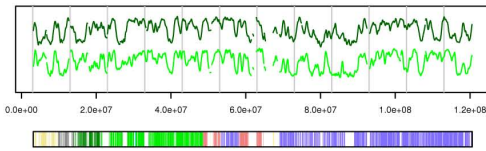

Human chromosomes

- 1
- 2
- 3
- 4
- 5
- 6
- 7
- 8
- 9
- 10
- 11
- 12
- 13
- 14
- 15
- 16
- 17
- 18
- 19
- 20
- 21
- 22
- X

Mouse chromosome 14

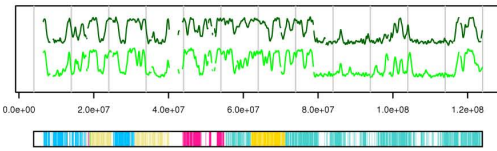

Mouse chromosome 15

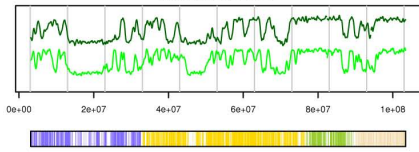

Supplement: pgen.1001011.s005.pdf [file pgen.1001011.s005.pdf]
