# Supplementary material for: Comparative Analysis of DNA Replication Timing Reveals Conserved Large-Scale Chromosomal Architecture
Source: PubMed Central journal article supplement (PMC2895651; doi:10.1371/journal.pgen.1001011), 2010-07-01

# Event 346, type:fusion, branch:(mouse, rat)

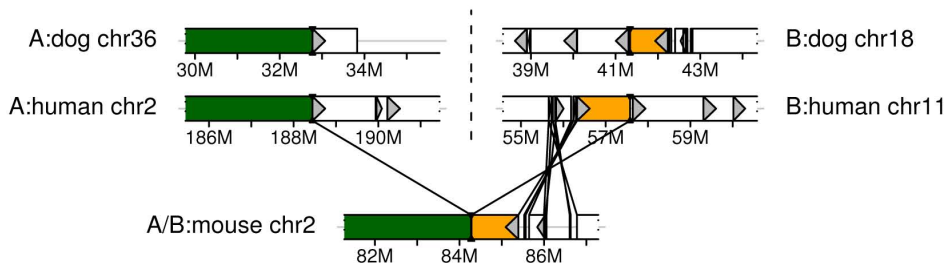

**fibroblast A: Human chr2**

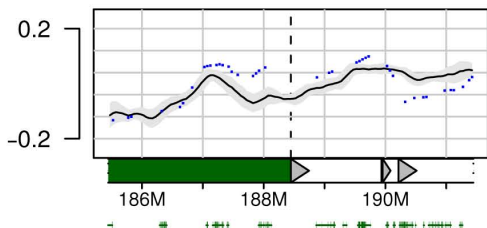

**lymphoblast A: Human chr2**

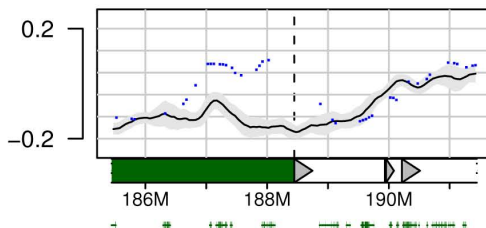

**fibroblast B: Human chr11**

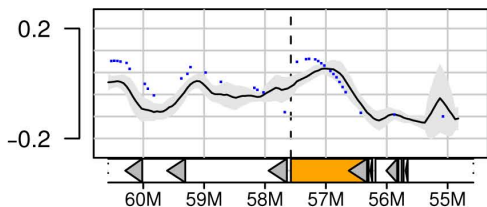

**lymphoblast B: Human chr11**

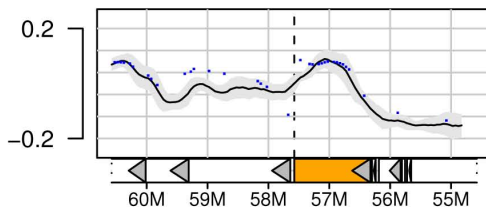

**fibroblast A/B: Mouse chr2**

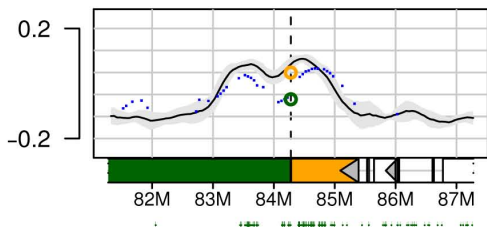

**lymphoblast A/B: Mouse chr2**

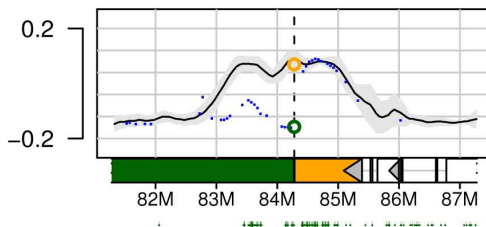

# Event 1771, type:fusion, branch:(mouse, rat)

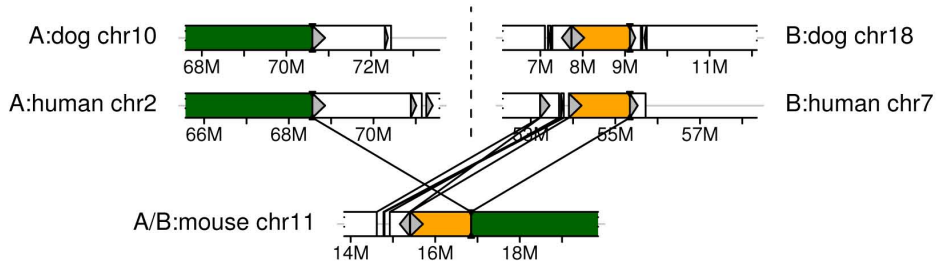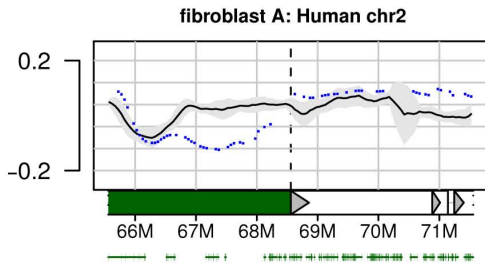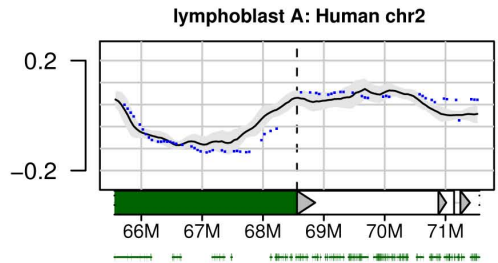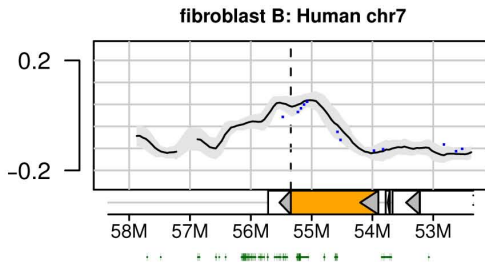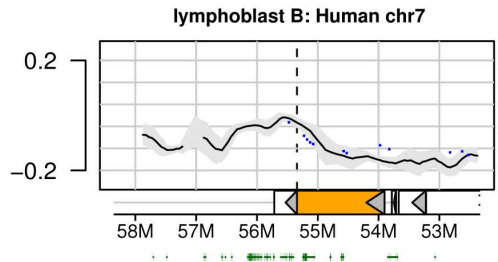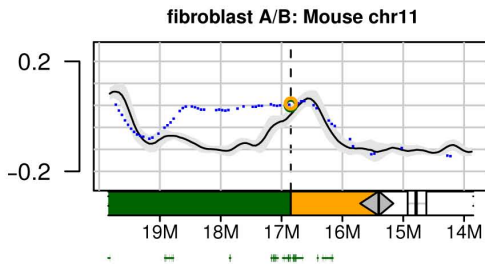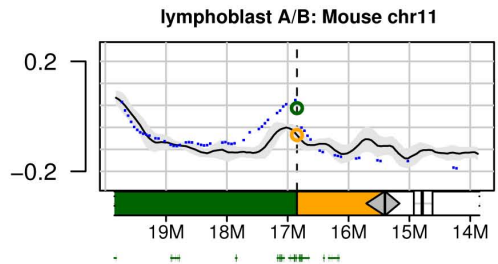

# Fibroblasts early to late invasion

fibroblast A/B: Mouse chr12

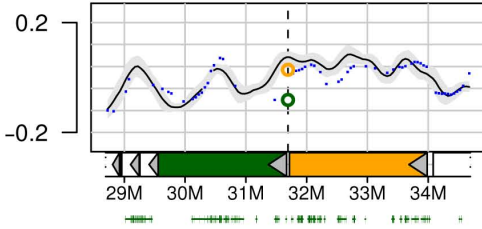

fibroblast A/B: Mouse chr17

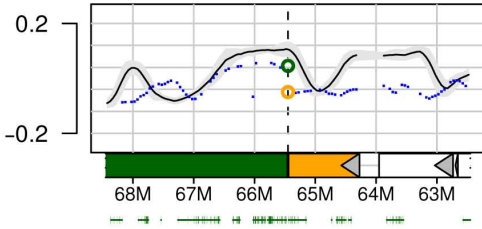

fibroblast A/B: Mouse chr9

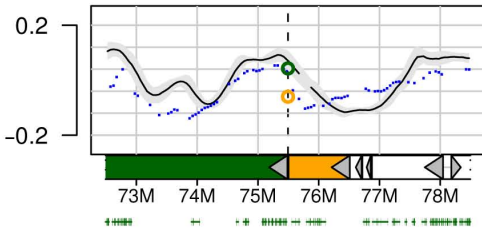

fibroblast A/B: Mouse chr3

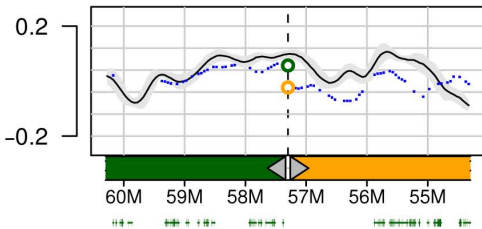

# Fibroblasts late to early invasion

fibroblast A/B: Mouse chr12

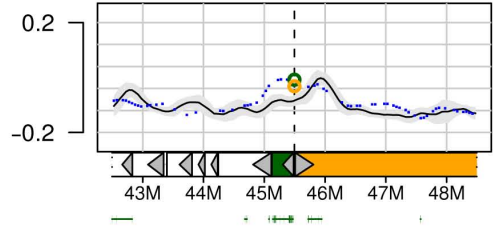

fibroblast A/B: Mouse chr19

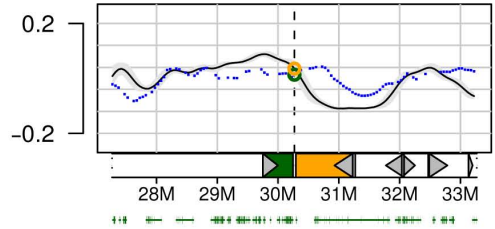

fibroblast A/B: Mouse chr6

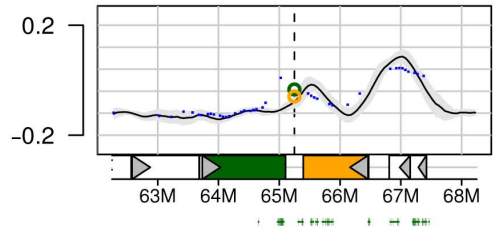

fibroblast A/B: Mouse chr14

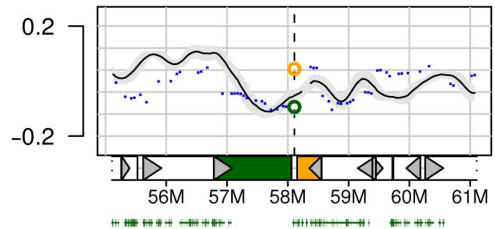

# Lymphoblasts early to late invasion

lymphoblast A/B: Mouse chr9

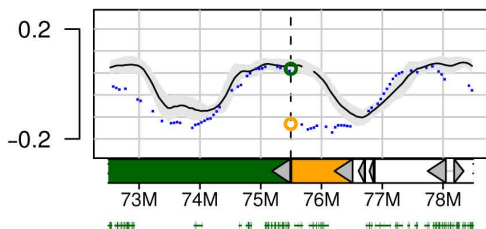

lymphoblast A/B: Mouse chr3

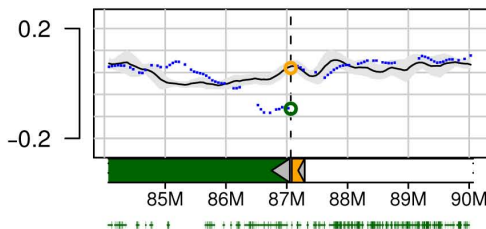

lymphoblast A/B: Mouse chr4

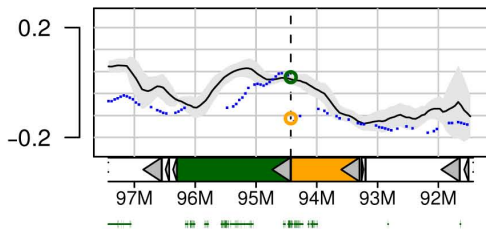

lymphoblast A/B: Mouse chr4

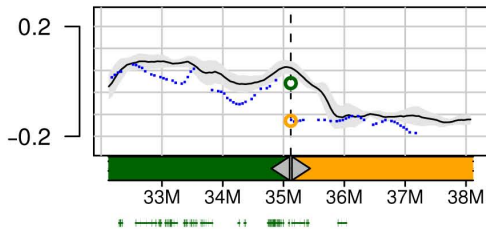

# Lymphoblasts late to early invasion

lymphoblast A/B: Mouse chr9

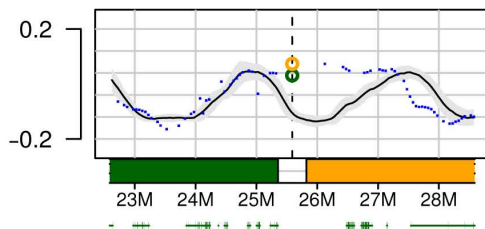

lymphoblast A/B: Mouse chr12

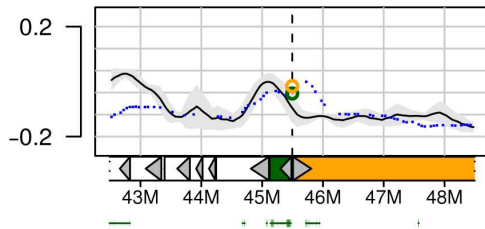

lymphoblast A/B: Mouse chr17

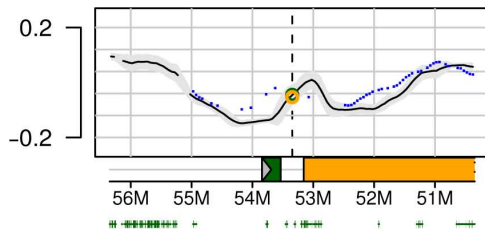

lymphoblast A/B: Mouse chr1

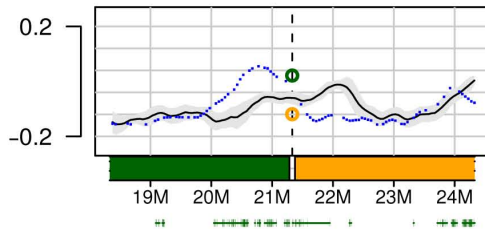

Supplement: pgen.1001011.s012.pdf [file pgen.1001011.s012.pdf]
