# Supplementary material for: Comparative Analysis of DNA Replication Timing Reveals Conserved Large-Scale Chromosomal Architecture
Source: PLoS Genet. 2010 Jul 1;6(7):e1001011. doi: 10.1371/journal.pgen.1001011 (PMC2895651; doi:10.1371/journal.pgen.1001011)
Supplement: Figure S4 — Conservation of time of replication in human and mouse cells. An expanded version of Figure 1A, showing ToR profiles for human fibroblasts and lymphoblasts and their corresponding projected mouse ToR profiles. Below each chromosome we show the human-mouse synteny map, color coded according to the corresponding mouse chromosomes. (0.87 MB PDF) [file pgen.1001011.s004.pdf]

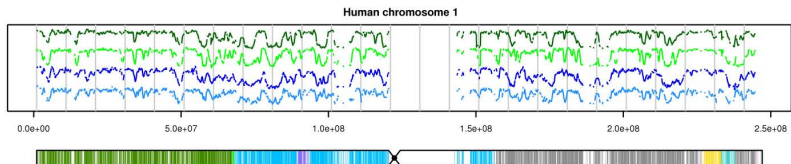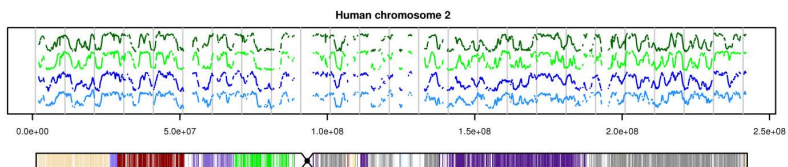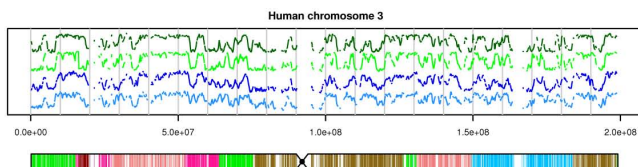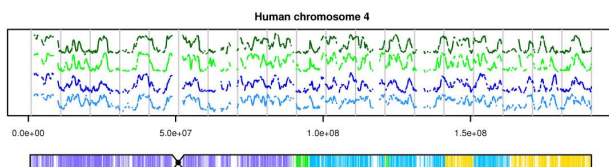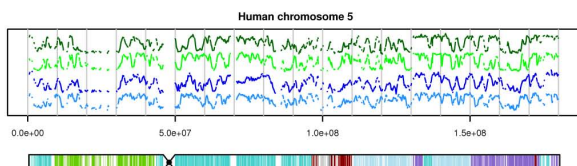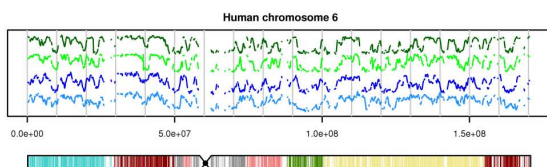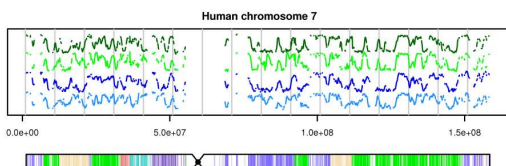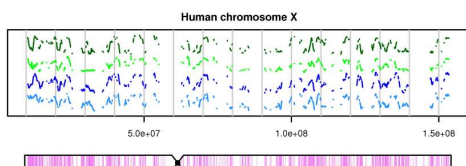

— Mouse lymphoblasts  
— Mouse fibroblasts  
— Human lymphoblasts  
— Human fibroblasts

Mouse chromosomes

- 1
- 2
- 3
- 4
- 5
- 6
- 7
- 8
- 9
- 10
- 11
- 12
- 13
- 14
- 15
- 16
- 17
- 18
- 19
- X

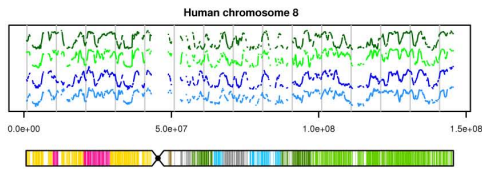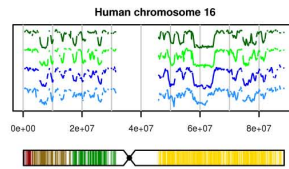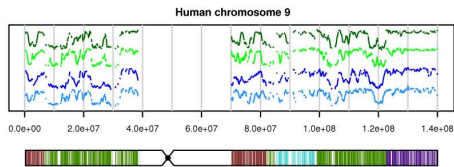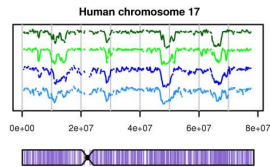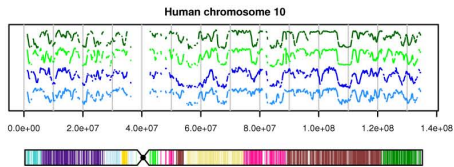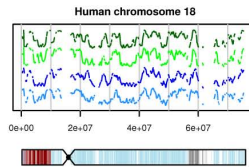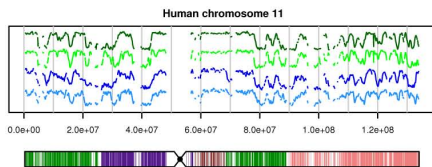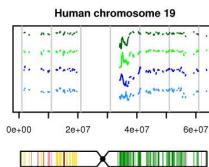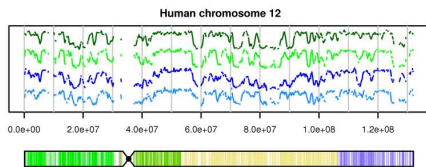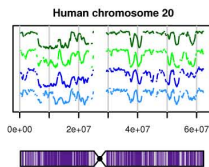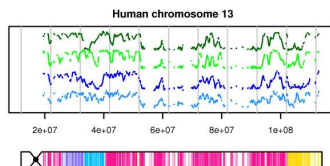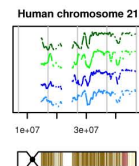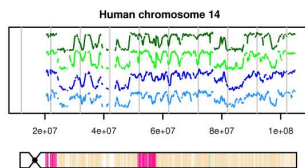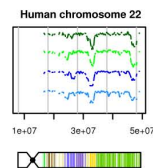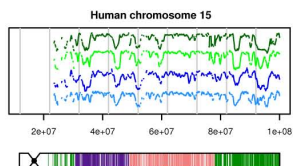

# Mouse chromosomes

- 1
- 2
- 3
- 4
- 5
- 6
- 7
- 8
- 9
- 10
- 11
- 12
- 13
- 14
- 15
- 16
- 17
- 18
- 19
- X
