# Supplementary material for: Comparative Analysis of DNA Replication Timing Reveals Conserved Large-Scale Chromosomal Architecture
Source: PLoS Genet. 2010 Jul 1;6(7):e1001011. doi: 10.1371/journal.pgen.1001011 (PMC2895651; doi:10.1371/journal.pgen.1001011)
Supplement: Table S1 — List of breakpoints. List of 880 fusion events used in the analysis. For each fusion we show the associated branch in the phylo-tree, the human and the mouse coordinates, and the strand (direction in each genome where the syntenic block lies). (0.19 MB XLS) [file pgen.1001011.s016.xls]

## Sheet: Sheet1
index	branch	chrA_hg	coordA_hg	strandA_hg	chrB_hg	coordB_hg	strandB_hg	chrA_mm	coordA_mm	strandA_mm	chrB_mm	coordB_mm	strandB_mm
2	rn3	1	26716468	+	1	28677528	+	4	133170657	-	4	131640614	-
5	rn3	12	72230497	+	12	72537903	+	10	113049516	-	10	112830079	-
10	rn3	7	100399580	+	7	100859895	+	5	137436253	-	5	137129145	-
11	rn3	18	32656864	-	18	32838357	-	18	25303017	-	18	25442105	-
12	rn3	2	18097079	-	2	18379522	-	12	10992736	+	12	10666306	+
13	rn3	16	13000186	+	16	12902511	-	16	11978339	+	16	11897254	-
14	mm8,rn3	2	2269	+	7	107556268	-	12	31669916	-	12	31715270	+
15	mm8,rn3	17	19606396	-	17	20950001	-	11	61018771	+	11	60994390	-
16	rheMac2	18	69391119	+	18	69667856	+	18	85732446	-	18	85420510	-
17	rn3	3	42596722	+	3	43853770	+	9	121551364	+	9	122315715	+
18	rn3	10	111721282	+	10	111966612	+	19	53149048	+	19	53373348	+
19	rheMac2	11	56324060	+	11	56184677	-	2	85392333	-	2	85645713	+
22	rn3	5	123458496	+	5	123391999	-	18	54546804	+	18	54465278	-
25	mm8,rn3	2	4140143	-	2	4231334	-	12	28959433	+	12	28953087	-
28	rn3	1	174941736	+	1	174679432	-	1	160678587	-	1	160919631	+
30	rn3	7	47733415	-	7	47866069	-	11	8685018	-	11	8803100	-
32	mm8,rn3	6	115279134	-	6	115381761	-	10	35569663	+	10	35557447	-
33	rn3	11	21800017	+	11	20735835	-	7	51009573	+	7	49897297	-
36	hg18,rheMac2	8	29226751	+	8	29226751	-	8	36290562	-	14	63582712	+
37	rn3	22	25968813	+	22	25837219	-	5	112024978	-	5	112118619	+
43	rn3	6	25932735	-	6	26281776	-	13	23882760	+	13	23620825	+
44	rn3	15	56685087	+	15	56777127	+	9	70571585	-	9	70509990	-
47	rn3	8	95563326	+	8	95654762	+	4	11480385	-	4	11406353	-
48	rn3	18	55063868	-	18	55501530	-	18	66026920	-	18	66399642	-
54	rn3	1	46475576	-	1	46732104	-	4	115629902	+	4	115434122	+
55	hg18	4	179363169	+	4	179357010	-	8	54143570	+	8	54287955	+
59	rn3	1	174679432	+	1	175041764	-	1	160919631	-	1	160582243	+
62	mm8,rn3	4	95497922	+	1	89569250	-	3	142405818	-	3	142432053	+
64	hg18,rheMac2	12	108971992	+	12	108971992	-	5	122913521	-	5	115075034	-
67	rn3	8	129070890	-	8	129297460	-	15	62005426	-	15	62196054	-
69	hg18	5	69356776	+	5	68961178	-	13	101226787	+	13	101530312	+
75	rn3	5	9957165	-	5	12497841	-	15	31863758	+	15	29511982	+
76	rn3	3	82610784	+	3	82538635	-	16	69416823	-	16	69490225	+
78	rn3	3	25296456	-	3	25499445	-	14	15538612	+	14	15321288	+
80	rn3	16	80463903	+	16	80755038	+	8	120456444	+	8	120685014	+
81	hg18,rheMac2	12	7285063	+	12	7274581	-	7	119471461	+	6	124345034	+
82	rn3	3	101417334	+	3	98790996	-	16	57183364	-	16	59785861	+
85	mm8	18	2524400	+	2	28882494	+	17	71456338	-	17	71456752	+
87	mm8,rn3	8	135134472	-	8	135301480	-	15	67432199	-	15	67432260	+
92	rn3	15	54850462	-	15	55136774	-	9	72016918	+	9	71820573	+
96	rn3	14	33613935	-	14	33703638	-	12	55250957	-	12	55357464	-
97	rn3	1	233750875	-	10	32537293	-	13	13740510	+	18	6363714	-
98	rheMac2	9	126697711	+	19	51011634	-	2	38854679	+	7	18212109	+
99	rn3	3	98790996	+	3	98733739	-	16	59785344	-	16	59858427	+
100	hg18	16	22463995	+	16	22339548	-	7	120929459	+	7	120795458	-
102	mm8,rn3	9	6740667	-	10	54514379	-	19	30245232	-	19	30292338	+
103	rn3	16	80463903	-	16	80755038	-	8	120455089	-	8	120680939	-
108	rn3	3	190922885	+	3	190844226	-	16	25668907	+	16	25612496	-
112	rn3	10	116140948	+	10	116528009	-	19	57048676	+	19	57372306	-
113	rn3	5	12587938	+	5	12367458	-	15	29460232	-	15	29618159	+
114	mm8	2	190213633	+	2	196299086	+	1	53306060	-	1	53328672	+
120	mm8,rn3	4	161463652	-	4	161668897	-	3	78050282	+	3	78036075	-
121	rn3	1	175846582	+	1	175930615	+	1	159754461	-	1	159644175	-
123	rn3	8	58214448	-	8	58592946	-	4	4890862	-	4	4950965	-
125	rn3	17	25087487	+	17	25432291	+	11	77181243	-	11	76932109	-
128	rn3	6	43194540	-	6	43418840	-	17	46063744	+	17	45871740	+
131	rheMac2	18	10574315	-	18	12031210	-	18	63128482	-	18	67451914	-
132	mm8,rn3	13	75591563	-	13	75739296	-	14	101060653	-	14	101069932	+
134	rn3	2	16870139	-	2	16954582	-	12	12140627	+	12	12078906	+
135	rn3	8	125619829	+	8	125918550	+	15	58762987	+	15	59024190	+
139	rn3	11	7802091	-	11	8071842	-	7	107918993	-	7	108813557	-
140	rn3	17	23858292	+	17	24152533	+	11	78202034	-	11	77939146	-
142	rn3	9	20422015	+	9	20728181	+	4	87326199	+	4	87622785	+
144	rn3	4	94113150	+	4	94025808	-	6	63733585	+	6	63681845	-
146	rheMac2	18	66703912	-	18	67485080	-	18	88491973	+	18	87698330	+
148	rn3	11	130945665	-	11	131161917	-	9	29512692	+	9	29298771	+
150	mm8,rn3	18	11545458	+	18	56487144	-	18	67156309	+	18	67149821	-
151	rn3	18	60193024	-	18	60345639	-	1	109935955	-	1	110101978	-
154	rn3	11	130945665	+	11	131161917	+	9	29512692	-	9	29298771	-
155	rn3	4	94025808	+	4	92988061	-	6	63686883	+	6	62563105	-
156	rn3	3	175584883	+	3	175875380	+	3	25437079	-	3	25131143	-
157	rn3	15	89061436	+	15	88888558	-	7	80408779	-	7	80548783	+
159	rn3	X	114095368	-	X	114189545	-	X	142498444	-	X	142668266	-
168	rheMac2	9	24414654	-	9	24543803	-	4	91504331	-	4	91645634	-
171	mm8,rn3	7	12515738	+	7	111712620	-	12	40678419	-	12	40890497	+
174	mm8	X	55114781	-	X	114426965	-	X	145851074	+	X	142831400	-
177	rn3	11	33611817	+	11	33876355	-	2	103979114	-	2	103742035	+
178	rn3	15	56685087	-	15	56777127	-	9	70571693	+	9	70512596	+
179	rn3	15	84210712	+	15	84345333	-	7	75806490	+	7	76015046	-
182	mm8	6	33436175	+	5	172662856	-	17	26644372	+	17	26628548	-
183	rn3	6	128009418	+	6	135256640	+	10	28588053	-	10	21103167	-
184	rheMac2	5	162211558	+	10	98555776	-	11	41171523	-	19	41452065	-
185	hg18	7	97435389	+	7	97341173	-	5	144264548	+	6	7644342	-
189	hg18,rheMac2	7	53715597	+	7	53670614	-	11	14778295	+	11	14926960	+
191	rn3	X	137593013	+	X	137501033	-	X	55452759	+	X	55384201	-
192	hg18	7	71781896	+	7	71609112	-	5	130587046	-	5	130640195	+
197	rn3	10	70825797	+	10	71897472	-	10	61669390	-	10	60789478	+
203	rn3	16	50832049	+	16	50952577	+	8	92930791	+	8	93055368	+
204	rn3	14	48862985	+	14	49512826	-	12	69798616	+	12	70370716	-
205	rn3	5	65217682	+	5	65352469	+	13	105087302	-	13	104982847	-
206	rheMac2	18	69391111	-	18	69667856	-	18	85732446	+	18	85420510	+
208	mm8	5	97171803	-	5	97306377	-	17	16257311	+	17	16242039	-
209	rn3	15	90773617	+	15	90852688	+	7	73850848	-	7	73775603	-
210	rn3	3	141757848	+	3	141968363	+	9	97273094	-	9	97051597	-
212	rn3	6	42347174	+	6	42631959	-	17	46770693	-	17	46500756	+
213	rn3	5	51603537	+	5	53004702	-	13	116618495	-	13	115418572	+
215	rheMac2	7	124951357	+	7	125159444	+	6	26327759	+	6	26495951	+
216	rheMac2	1	37994340	+	1	37897714	-	4	124394628	-	4	124469337	+
220	rn3	18	73862487	-	18	74305363	-	18	81862083	+	18	81518261	+
221	mm8,rn3	15	49111181	+	11	106949945	+	9	53824785	+	9	53781347	-
223	mm8,rn3	6	87130874	+	9	27302888	+	4	35099399	-	4	35137833	+
225	rn3	4	19511024	+	4	19586834	+	5	47918080	+	5	48002612	+
226	rn3	2	85343919	+	2	85089316	-	6	72599840	-	6	72802777	+
228	rn3	1	74559776	+	1	74464569	-	3	154926027	-	3	154998048	+
234	rn3	6	64744818	-	6	64854157	-	1	30476333	+	1	30357414	+
236	rn3	9	102725853	+	9	102946866	+	4	48973703	+	4	49197605	+
239	rn3	11	34353692	-	11	34566835	-	2	103338743	+	2	103145962	+
242	mm8,rn3	X	140834183	-	X	141069941	-	X	58552589	-	X	58583031	+
245	mm8	18	827796	-	2	28882494	-	5	32865895	+	5	32769790	-
248	mm8,rn3	15	49739443	+	6	56112223	-	9	75485044	-	9	75503716	+
249	rn3	4	188891623	-	4	189038872	-	8	45347593	+	8	44912104	+
251	mm8	6	115735215	+	6	115980694	+	10	34756873	+	10	34756137	-
254	rn3	12	23665696	+	12	23275728	-	6	143880164	+	6	143586039	-
258	rn3	16	82102731	+	16	81712273	-	8	122005087	+	8	121640367	-
259	rn3	10	94607308	-	10	94879255	-	19	37617109	-	19	37801962	-
261	rn3	3	190844226	+	3	190979455	-	16	25618503	+	16	25706979	-
264	rn3	2	183495301	+	2	183369765	-	2	80300686	+	2	80169244	-
265	mm8,rn3	12	130923728	+	22	27491722	-	5	111050616	-	5	111064340	+
266	mm8	5	97171803	+	5	97306377	+	17	16177978	+	17	16175004	-
270	rn3	4	33314937	+	4	33817370	+	5	60810879	+	5	61367542	+
272	rn3	13	63879202	+	13	64065112	+	14	89754179	+	14	90040689	+
275	rn3	3	145317932	-	3	145425082	-	9	94207888	+	9	94089155	+
276	hg18	15	80991883	+	15	80431055	-	7	81216205	+	7	82508674	+
278	rn3	14	49512826	+	14	48941343	-	12	70370716	+	12	69892182	-
279	rn3	11	42177806	+	11	42384594	+	2	95416050	-	2	95250913	-
280	rn3	1	78225022	-	1	78327680	-	3	152142163	+	3	152070923	+
286	rn3	11	31445665	-	11	31521865	-	2	105731456	+	2	105666692	+
287	rheMac2	3	128299335	+	12	85552016	+	6	89254345	-	10	101302065	-
296	rn3	8	4372420	+	8	4761557	+	8	17124056	+	8	17466997	+
299	mm8,rn3	10	2299595	+	10	2442299	+	13	7469409	+	13	7455023	-
300	rn3	5	53004702	+	5	52174065	-	13	115416226	-	13	116174696	+
301	rn3	10	67860962	-	10	70140649	-	10	63956863	+	10	62198100	+
302	rn3	4	33412885	+	7	80040343	-	5	60904350	+	5	17419240	+
303	rheMac2	6	108413211	-	6	159271090	-	10	42416071	+	17	6731740	-
304	rn3	17	55297353	+	17	53167490	-	11	86377588	-	11	88119795	+
306	rn3	1	18792317	+	1	18702200	-	4	139133023	-	4	139214268	+
307	rn3	22	37371232	+	22	37185915	-	15	79475835	+	15	79337265	-
308	rn3	3	74852697	-	3	74929009	-	6	102675407	-	6	102805852	-
310	rn3	1	19139847	+	1	19250963	+	4	138860665	-	4	138774617	-
311	rheMac2	6	62025053	+	6	62293441	+	1	32864447	-	1	32741849	-
312	hg18,rheMac2	16	19318159	+	16	19300953	-	7	118408204	+	7	118099899	+
314	hg18,rheMac2	6	63809935	+	6	63809935	-	1	31422891	-	1	31476721	-
317	rn3	2	115925360	+	2	116051546	+	1	125570648	-	1	125433093	-
320	mm8,rn3	21	42335010	+	6	39171889	-	17	30680899	+	17	30667892	-
323	mm8,rn3	18	52407369	+	18	11545458	-	18	63787385	+	18	63759997	-
327	mm8	6	159379564	-	6	167312281	-	17	6807568	-	17	6820309	+
328	mm8,rn3	1	233393827	+	7	43722561	-	13	13991888	-	13	14018227	+
331	rn3	13	63879202	-	13	64040048	-	14	89748414	-	14	89999789	-
332	rn3	1	19139847	-	1	19250963	-	4	138860665	+	4	138777326	+
336	mm8,rn3	2	9271827	+	2	10455483	-	12	21364232	+	12	17792920	-
337	mm8,rn3	8	36829656	+	8	42781321	+	8	27649876	+	8	27629754	-
342	rn3	7	30622774	-	7	30770711	-	6	54994473	-	6	55113631	-
344	rheMac2	13	77824285	+	13	77741776	-	14	103138242	+	14	103053050	-
345	rn3	12	83349987	-	12	83521388	-	10	103389672	+	10	103235491	+
346	mm8,rn3	2	188445860	-	11	57575995	-	2	84274089	-	2	84283494	+
351	mm8	18	827796	+	5	108683141	+	17	93444638	+	17	93135609	-
354	hg18,rheMac2	17	33727645	+	17	33285080	-	11	97140500	+	11	83603097	+
357	hg18,rheMac2	17	60362445	+	17	60185638	-	11	109274581	-	11	106813455	-
358	rn3	13	40505159	+	13	52711678	+	14	78240865	-	14	78993227	+
359	mm8,rn3	X	23759871	+	X	57417700	+	X	90671852	-	X	90934413	+
360	mm8	2	194482721	+	2	194612333	+	1	48785849	+	1	48780614	-
362	mm8,rn3	3	46404217	+	3	37240193	-	9	110913666	-	9	110930652	+
367	mm8,rn3	1	93640314	+	4	121063011	-	3	122627731	-	3	122638546	+
371	rn3	4	115055015	+	4	115211409	-	3	126419552	-	3	126292080	+
374	rn3	1	173933530	+	1	174276705	+	1	161406768	-	1	161146382	-
376	mm8,rn3	2	9197131	-	2	10211413	-	12	25313078	+	12	25307141	-
378	hg18,rheMac2	4	70510841	+	4	69057415	-	5	88546447	+	5	87778930	+
380	hg18	22	19385580	+	22	19360203	-	16	17189776	+	16	17534792	+
382	rn3	4	175833636	+	4	176010455	+	8	58982251	-	8	58819070	-
392	rn3	17	23858292	-	17	24152533	-	11	78202034	+	11	77945551	+
394	mm8,rn3	8	62883242	+	6	100496627	-	4	21482291	-	4	21524613	+
399	rn3	2	148250695	-	2	148321756	-	2	48568431	-	2	48639223	-
400	hg18,rheMac2	4	68851679	+	4	68816383	-	5	87912405	-	5	87777982	-
401	mm8	5	108834528	+	5	108683141	-	17	64273172	+	17	63951905	-
402	rn3	4	167393090	+	4	167489648	+	8	66669603	-	8	66573168	-
405	hg18,rheMac2	22	46140553	+	22	46085041	-	15	86536491	-	15	86413307	-
407	rn3	10	111721282	-	10	111966612	-	19	53149048	-	19	53373136	-
409	rn3	X	120817109	+	X	120615303	-	X	36497207	+	X	36234390	-
412	rn3	5	87993653	+	5	88076794	+	13	84216726	-	13	84117026	-
413	mm8	10	5930542	+	10	15501681	+	2	11712843	-	2	11920234	+
414	rn3	3	25296456	+	3	25674676	+	14	15538612	-	14	15166712	-
418	rn3	9	93352799	+	9	93777027	+	13	53064881	+	13	53315188	+
419	rn3	5	65666010	+	5	65433771	-	13	104735109	-	13	104936418	+
423	rn3	5	122096108	+	5	123458496	-	18	53270353	+	18	54541228	-
424	hg18,rheMac2	15	28978936	+	15	28182819	-	7	64253110	-	7	65516589	-
428	rn3	21	31285956	+	21	32329631	+	16	89568987	+	16	90415388	+
430	rn3	22	37063336	+	22	37185915	+	15	79283624	+	15	79337265	+
435	mm8	19	15130349	+	21	43955459	-	17	31849393	+	17	31794222	-
436	rn3	6	43022028	+	6	43418840	+	17	46192533	-	17	45871740	-
438	mm8,rn3	18	10077592	-	5	110199472	-	17	65459029	+	17	65440923	-
439	rn3	X	113306360	+	X	113203238	-	X	141904393	+	X	141803470	-
440	mm8	5	172662856	+	3	21729740	-	11	31248911	+	11	31231506	-
442	rn3	1	18562072	+	1	18792317	-	4	139308974	-	4	139133092	+
445	hg18	X	16164900	+	X	16158723	-	X	158638899	+	X	158743875	+
449	rheMac2	11	1246083	-	11	1303033	-	7	141684289	-	7	141720679	-
450	rheMac2	9	91718616	+	9	126799091	+	13	52101111	+	2	38921196	+
453	mm8,rn3	2	188445860	+	13	102329140	-	1	44380220	+	1	44125733	-
456	rn3	5	123391999	+	5	122096108	-	18	54465278	+	18	53268165	-
461	rn3	10	52998050	+	10	89965488	+	19	31270613	-	19	33133227	+
463	rheMac2	3	78415725	+	3	78348835	-	16	73172825	-	16	73218321	+
467	rn3	5	41980150	+	5	41789148	-	15	3914900	-	15	4088254	+
469	rn3	1	90761504	+	1	90879857	+	5	106553895	+	5	106636995	+
470	mm8,rn3	7	36476389	+	6	28772831	-	13	21046084	-	13	21289217	+
472	hg18	7	102118852	+	7	101907126	-	5	20899115	+	5	136401185	+
473	rheMac2	7	118717084	-	7	119226071	-	6	20075288	-	6	20618995	-
478	rn3	6	25932735	+	6	26369668	+	13	23882345	-	13	23543394	-
481	mm8	6	115735215	-	6	115938128	-	10	35060364	+	10	34978514	-
482	rn3	10	129968342	+	10	129868376	-	7	135689589	+	7	135608225	-
484	rn3	20	57196359	+	20	57723969	-	2	174285561	+	2	178164818	-
486	rheMac2	3	36629889	+	3	187900316	-	9	111368585	-	16	22879256	-
487	mm8,rn3	2	8080134	-	2	8181341	-	12	26199717	+	12	26195929	-
488	rn3	9	108553384	+	9	108197057	-	4	54853025	+	4	54452129	-
489	mm8,rn3	1	58839121	+	9	27302888	-	4	94433615	+	4	94422648	-
491	hg18,rheMac2	2	184119721	+	2	184119721	-	2	81072833	-	2	80818447	-
494	mm8,rn3	2	51558013	-	2	51924262	-	17	91584794	-	17	91595523	+
495	rn3	13	60225406	+	13	60448687	+	14	86582481	+	14	86881702	+
496	mm8,rn3	12	16918259	+	12	16999565	+	6	138679163	-	6	138682888	+
501	hg18	16	72919168	+	16	72919082	-	8	114038961	+	8	110454009	+
503	rn3	8	95563326	-	8	95654762	-	4	11482112	+	4	11412489	+
504	rn3	3	123277885	+	3	123521343	+	16	36563376	-	16	36050912	-
505	mm8,rn3	19	47011251	+	19	47706755	+	7	24573285	+	7	24547876	-
507	mm8,rn3	18	39439887	-	2	128534101	-	18	31700277	-	18	31776283	+
510	rheMac2	19	35080668	-	3	78412821	-	7	37751894	+	16	73176820	+
511	rn3	3	141757848	-	3	141808681	-	9	97273094	+	9	97215152	+
512	rheMac2	X	105179561	+	X	105241607	+	X	134442294	+	X	134527045	+
513	rn3	10	128781516	-	10	129968342	-	7	134673249	-	7	135689589	-
515	rn3	6	107650471	+	6	108733977	-	10	43074758	-	10	42157936	+
517	rn3	7	12125309	+	7	12268242	+	6	12926766	+	6	13053411	+
520	hg18	4	179539587	+	4	179533873	-	8	54134418	-	8	54240563	-
523	mm8,rn3	14	57717763	+	14	51331356	-	12	71856365	+	12	71845015	-
528	mm8,rn3	6	52856405	+	6	74068693	+	9	78044968	-	9	78181388	+
531	rn3	1	31073570	+	1	31445428	+	4	130127867	-	4	129849459	-
532	mm8,rn3	12	87199529	+	12	87263183	+	10	99661941	+	10	99642085	-
535	rn3	5	129929916	-	5	130171904	-	18	59895332	-	18	60053423	-
537	rn3	14	43213980	-	14	43491618	-	12	64431734	-	12	64818875	-
538	rn3	11	24508097	+	11	24445684	-	7	54731765	+	7	54673977	-
539	rn3	14	99962299	+	14	100178303	+	12	109387957	+	12	109820759	+
540	rn3	3	159534935	+	3	159416904	-	3	67293942	+	3	67200717	-
541	rn3	12	83349987	+	12	83231727	-	10	103388826	-	10	103509607	+
542	mm8,rn3	7	104997388	+	7	19653416	-	12	33983112	-	12	34080866	+
543	rn3	16	78918980	-	16	79223188	-	8	119209252	-	8	119480924	-
544	mm8,rn3	13	101961657	+	2	106078514	-	1	43861586	+	1	43696733	-
546	rheMac2	19	19507748	+	1	37994340	-	8	72817723	-	4	124394668	+
547	rn3	1	28677528	-	1	26716468	-	4	131641573	+	4	133171490	+
549	rn3	6	77614107	-	6	77750346	-	9	80875296	-	9	80996626	-
550	rn3	X	114125802	+	X	114189545	+	X	142629342	+	X	142668728	+
551	mm8,rn3	5	98440735	+	2	242464283	-	1	95954667	+	1	95885970	-
560	hg18,rheMac2	3	78103189	+	3	78097498	-	16	73461619	-	16	73577382	-
561	rn3	2	195312317	+	2	195237662	-	1	47884719	-	1	48002252	+
563	rn3	5	65433771	+	5	65352469	-	13	104928618	-	13	104983357	+
564	hg18,rheMac2	13	54980571	+	13	54980571	-	14	81501769	-	14	81276450	-
566	rn3	6	76120771	-	6	76342475	-	9	79639661	-	9	79812653	-
568	rn3	12	104403289	+	12	103887771	-	10	83301543	+	10	82783671	-
575	rn3	3	27890515	-	3	28004307	-	9	118253239	+	9	118174739	+
577	rn3	5	53686103	+	5	54178612	-	13	114881002	-	13	114456641	+
578	hg18,rheMac2	10	30966782	+	10	30929673	-	18	5022310	+	18	4231016	+
583	mm8,rn3	7	22779028	+	7	104997388	-	5	23348197	+	5	23333702	-
584	mm8	4	138384190	-	4	138457743	-	3	49401920	-	3	49581168	+
585	hg18,rheMac2	13	55186950	+	13	55186950	-	14	81509084	+	14	81288942	+
587	rn3	7	96155710	+	7	96058482	-	6	6508054	+	6	6408168	-
589	mm8	4	138384190	+	4	138457743	+	3	49638407	-	3	49654041	+
592	rn3	6	42423948	-	6	42511741	-	17	46710276	+	17	46625378	+
593	rn3	2	54477850	+	2	54922154	+	11	30254452	-	11	29759987	-
594	rn3	X	137397815	+	X	137593013	-	X	55296804	+	X	55452704	-
596	mm8,rn3	7	150193080	+	7	23213047	-	5	23756650	+	5	23693034	-
599	mm8,rn3	2	122317525	-	2	125639358	-	1	120093809	+	1	118438907	-
602	rn3	7	108848056	-	7	109099238	-	12	44244023	+	12	44022250	+
607	hg18	6	121982612	+	6	121982355	-	10	56302699	-	10	56254149	-
608	rn3	6	77614107	+	6	77750346	+	9	80877409	+	9	80996626	+
610	rn3	X	148221936	+	X	148315177	+	X	66469884	+	X	66551637	+
611	rn3	1	173933530	-	1	174276705	-	1	161406768	+	1	161150827	+
613	rn3	6	64744818	+	6	64621951	-	1	30476333	-	1	30624321	+
614	mm8	2	194482721	-	2	194612333	-	1	48964646	+	1	48915580	-
617	rn3	4	189422800	-	4	189516911	-	8	44486188	+	8	44404625	+
621	rn3	10	128781516	+	10	129868376	+	7	134674409	+	7	135609725	+
622	rheMac2	2	111109449	+	2	111174745	+	2	127492223	+	2	127525321	+
623	rn3	4	188246102	-	4	188307497	-	8	46067537	+	8	45994833	+
625	rn3	3	29151448	+	3	43312089	+	9	117257304	-	9	121976663	+
628	rn3	5	87993653	-	5	88076794	-	13	84217360	+	13	84117116	+
630	rn3	7	117577211	+	7	117739608	+	6	18767021	+	6	18912688	+
631	rn3	1	90469375	-	1	90652894	-	5	106314549	-	5	106470043	-
632	mm8,rn3	3	150482166	-	8	67478392	-	3	20145297	+	3	20071306	-
640	rn3	3	159416904	+	3	160053486	-	3	67200717	+	3	67721444	-
641	rheMac2	X	105159915	-	X	105241607	-	X	134411947	-	X	134525062	-
643	rn3	3	95385663	-	3	95706285	-	16	62590537	+	16	62243486	+
647	mm8,rn3	7	22547144	+	7	156787334	-	5	30171764	+	5	30006885	-
648	mm8,rn3	6	112978445	-	6	113111776	-	10	38210318	+	10	38198671	-
654	mm8,rn3	10	28970319	+	10	35264624	+	18	3489851	+	18	3436744	-
656	rn3	11	33692088	+	11	33781172	+	2	103909396	-	2	103804200	-
659	mm8,rn3	2	139523441	+	9	127002119	-	2	39329831	+	2	39050762	-
660	mm8,rn3	8	62947371	-	8	63135255	-	4	21401418	+	4	21393280	-
661	rn3	X	113141303	-	X	113306360	-	X	141721364	-	X	141896116	-
662	mm8,rn3	2	8094920	+	2	8181341	+	12	26145771	+	12	26127031	-
663	mm8,rn3	12	16918259	-	12	16999565	-	6	138632836	-	6	138635086	+
667	hg18,rheMac2	11	55756141	+	11	55722093	-	2	86630585	-	2	86059445	-
669	rn3	8	84577532	+	8	84787700	+	3	12618881	+	3	12935325	+
670	hg18,rheMac2	7	65213232	+	7	65203260	-	5	130312383	+	5	130296118	+
677	rn3	6	103303153	+	6	101976236	-	10	47900723	-	10	49453022	+
678	rn3	10	116528009	+	10	116456773	-	19	57380307	+	19	57311740	-
680	rn3	11	7538031	+	11	7594485	+	7	107441090	+	7	107495958	+
681	rheMac2	3	14073054	+	12	85552016	-	6	91427832	+	10	101302065	+
684	rn3	21	31285956	-	21	32329631	-	16	89568052	-	16	90414183	-
690	rn3	13	58942830	-	13	59135619	-	14	85285799	-	14	85484467	-
694	rn3	17	64002679	+	17	60563984	-	11	109455395	+	11	109114226	+
697	rn3	3	7120864	+	3	7376585	+	6	110836831	+	6	111132541	+
701	rn3	7	20194665	+	7	20140768	-	12	119858836	-	12	119920799	+
705	rn3	16	12902511	+	16	13256649	-	16	11897254	+	16	12208151	-
706	mm8,rn3	3	139837920	+	3	140091179	+	9	98813328	+	9	98789304	-
709	rn3	4	165892917	+	4	165830407	-	8	68058846	-	8	68153255	+
710	rn3	2	148250695	+	2	148321756	+	2	48568431	+	2	48639223	+
713	hg18	1	145043890	+	1	144000391	-	3	97761325	-	3	98164538	-
718	rn3	2	123577060	+	2	122982454	-	1	116722005	+	1	116174982	-
719	hg18,rheMac2	8	9712764	+	8	9698900	-	14	63576354	-	8	36292605	+
723	rheMac2	13	104247963	+	13	104558479	+	8	6812805	+	8	7158427	+
724	rn3	2	195252022	+	2	194888941	-	1	47934698	-	1	48467909	+
725	rheMac2	11	82730676	-	11	82807868	-	7	92393512	+	7	92378675	+
729	mm8,rn3	22	17975093	+	3	184313380	+	16	18626389	-	16	19568328	+
732	rn3	12	84390709	+	12	84463619	+	10	102254345	-	10	102195605	-
733	rn3	12	23275728	+	12	21884456	-	6	143589074	+	6	142581063	-
734	rn3	7	86393571	+	7	86320328	-	5	9433982	-	5	9508406	+
737	rn3	18	68787468	-	18	69060037	-	18	86433771	+	18	86141365	+
739	hg18,rheMac2	17	63697120	+	17	63493762	-	11	109232153	+	11	106784720	+
740	rn3	2	16870139	+	2	16954582	+	12	12132718	-	12	12067356	-
743	rn3	11	106549812	+	12	55521756	-	9	3479130	-	10	127367842	+
744	mm8,rn3	9	85404555	+	5	137141445	-	13	58185665	+	13	58139001	-
746	rn3	10	67231033	+	10	67154270	-	10	64499815	-	10	64572804	+
747	rn3	1	18702200	+	1	18562072	-	4	139206001	-	4	139308974	+
748	rn3	X	115605054	-	X	115854237	-	X	20993173	-	X	21306000	-
751	hg18	7	2537651	+	7	2537412	-	5	140976867	-	5	140870807	-
752	mm8,rn3	7	91358984	-	7	91607723	-	5	4193316	+	5	4111552	-
755	rn3	1	74368511	+	1	74464569	+	3	155059046	-	3	154998038	-
759	rn3	4	18133956	+	4	18355445	+	5	46543729	+	5	46789278	+
760	mm8	11	97257666	-	11	97570690	-	9	11849588	+	9	11714612	-
761	rn3	1	106807391	+	1	107045933	+	3	111032960	-	3	110765149	-
766	rn3	3	175584883	-	3	175875380	-	3	25437079	+	3	25131143	+
768	mm8	4	150215216	-	4	150266812	-	8	79159023	+	8	79153101	-
769	rn3	5	9957165	+	5	12497841	+	15	31854383	-	15	29500414	-
771	rn3	18	68787468	+	18	69060037	+	18	86425033	-	18	86141365	-
773	rheMac2	7	124951357	-	7	125159444	-	6	26325686	-	6	26492971	-
775	rn3	5	38203988	+	5	35656216	-	15	7427252	-	15	9691631	+
776	rn3	15	68459165	+	15	68742346	-	9	60917534	-	9	60673055	+
780	rn3	7	86320328	+	7	86795550	+	5	9502760	-	5	9047740	-
781	rn3	X	149863061	+	X	148315177	-	X	67797515	+	X	66548287	-
782	mm8,rn3	3	27533804	-	3	27598887	-	14	13473615	+	14	13468342	-
784	rn3	X	146933990	+	X	147115134	-	X	65100561	+	X	65352458	-
787	hg18	11	3581383	+	11	3360047	-	7	101952498	+	7	143594592	-
788	rheMac2	3	164302408	-	3	164359047	-	3	71601992	-	3	71661049	-
791	rn3	4	188246102	+	4	188307497	+	8	46067537	-	8	45994833	-
792	mm8,rn3	8	87125478	+	8	64208564	-	4	19879469	-	4	19900399	+
793	rn3	X	137501033	+	X	137397815	-	X	55389052	+	X	55296513	-
797	rn3	20	40753985	-	20	40829316	-	2	161861860	-	2	161942352	-
800	mm8,rn3	5	173664084	+	5	174199871	+	13	53775709	-	13	53779738	+
801	mm8	2	190213633	-	2	196299086	-	1	45952106	-	1	46758880	+
802	rn3	21	35864081	+	21	35727095	-	16	93146198	+	16	93045800	-
803	rn3	X	115605054	+	X	47361212	-	X	21107687	+	X	20074957	-
805	rn3	5	116539169	+	5	116852398	+	18	48114345	+	18	48463071	+
806	mm8,rn3	3	27706400	+	3	37240193	+	9	118338591	-	9	118344803	+
808	rn3	3	96085359	+	3	96545291	+	16	61941294	-	16	61604177	-
811	mm8	X	42740855	+	X	42861911	+	X	14802164	-	X	14823237	+
812	rn3	22	37063336	-	22	37371232	-	15	79283594	-	15	79475622	-
814	rn3	4	167393090	-	4	167489648	-	8	66676590	+	8	66592864	+
815	rn3	3	42596722	-	3	43312089	-	9	121551364	-	9	121976663	-
819	mm8,rn3	10	2299595	-	10	2442299	-	13	7642305	+	13	7621329	-
823	rn3	X	150760722	+	X	150569257	-	X	68421244	+	X	68183491	-
824	mm8,rn3	19	34782872	-	19	56741963	-	7	40729501	-	7	43275679	+
826	rn3	16	81712273	+	16	82190001	-	8	121641371	+	8	122079867	-
827	rn3	14	37077703	+	14	36969635	-	12	58403730	+	12	58338894	-
830	rn3	17	38319644	+	17	37886565	-	11	101195707	+	11	100845491	-
831	hg18	7	76617482	+	7	75988337	-	5	20927244	-	5	136330418	-
834	rn3	10	113263695	+	10	113369634	+	19	54505822	+	19	54613112	+
838	rn3	X	146993466	-	X	147310396	-	X	65159466	-	X	65539085	-
839	hg18,rheMac2	4	165776290	+	4	165776290	-	8	68206619	-	8	68356877	-
842	rn3	14	33707091	+	14	33613935	+	12	55361574	+	12	55251212	+
843	rn3	18	25754035	-	18	25942952	-	18	18794984	-	18	19056892	-
845	rn3	6	23774110	-	6	24051462	-	13	25727415	+	13	25477362	+
846	rn3	13	39307522	+	13	39117653	-	3	53018478	-	3	53110689	+
848	rn3	X	153221170	-	X	153483611	-	X	70469912	-	X	70707053	-
849	mm8	18	69123591	-	18	69196668	-	18	86061595	+	18	86031145	-
854	rn3	7	117577211	-	7	117739608	-	6	18760795	-	6	18908258	-
855	mm8	9	26053281	+	9	26137661	+	4	93265421	-	4	93298324	+
856	rheMac2	4	52380032	+	4	86205701	+	5	73753662	+	5	102382126	+
857	mm8,rn3	5	96696568	-	5	96833574	-	17	16607295	+	17	16593519	-
859	rn3	11	23274351	+	11	24508097	-	7	53899777	+	7	54731765	-
860	hg18,rheMac2	8	5378396	+	8	5350809	-	8	18174464	-	8	17847426	-
861	mm8,rn3	6	92442	+	6	20196309	+	13	30567516	+	13	30271811	-
863	rn3	2	22676574	-	2	22843365	-	12	6290147	+	12	6101129	+
866	mm8,rn3	X	37225565	+	X	48069429	+	X	8280297	+	X	7440419	-
867	rn3	12	103923166	+	12	104474571	-	10	82917448	+	10	83347294	-
868	rn3	11	39139093	-	11	39310556	-	2	98622765	+	2	98350324	+
869	rn3	2	222221077	-	2	222410121	-	1	77474549	-	1	77655913	-
870	mm8,rn3	X	130372678	-	X	130563328	-	X	46265057	-	X	46314104	+
872	rn3	2	122982454	+	2	122614342	-	1	116182422	+	1	115718275	-
876	rn3	19	41239473	-	19	41663985	-	7	29986274	+	7	29787480	-
877	mm8,rn3	5	96696568	+	5	96833574	+	17	16539722	+	17	16532774	-
879	mm8,rn3	X	9648020	-	X	37180265	-	X	73915730	-	X	74727234	+
881	rn3	16	14304784	+	16	13978676	-	16	13362631	+	16	13089175	-
882	mm8	5	41609337	+	5	41679276	+	15	4176643	+	15	4172772	-
883	hg18,rheMac2	15	89380488	+	15	89380488	-	7	75244808	-	7	80143067	+
884	rheMac2	2	3557187	+	2	3035258	-	12	29245900	-	12	29556971	+
888	hg18,rheMac2	3	130584825	+	3	130549730	-	6	115772583	+	6	87948059	-
889	rheMac2	3	187900316	+	3	36629208	-	16	22966486	+	9	111377950	+
890	rn3	15	43280125	-	15	43404541	-	2	122069021	-	2	122227422	-
891	rn3	5	12367458	+	5	12587938	-	15	29617067	-	15	29467582	+
892	rn3	9	102725853	-	9	102946866	-	4	48973703	-	4	49195720	-
895	hg18,rheMac2	12	106775276	+	12	106775276	-	5	113609500	+	10	85364150	-
896	mm8	6	65083250	-	6	65149523	-	1	30065728	+	1	30062507	-
897	rn3	17	37886565	+	17	38393489	-	11	100845974	+	11	101245958	-
899	rn3	X	140670097	+	X	140736782	+	X	58425955	+	X	58491391	+
900	rn3	7	87319559	+	7	87675881	+	5	8443681	-	5	8070484	-
903	mm8,rn3	3	105201048	-	3	105303239	-	16	53581290	+	16	53559527	-
906	rn3	11	31445665	+	11	31521865	+	2	105722647	-	2	105666077	-
909	hg18,rheMac2	12	7940893	+	12	7378247	-	6	122693348	+	7	119507152	-
910	mm8,rn3	9	83216628	+	9	83286956	+	4	71456674	-	4	71474569	+
911	rn3	19	41005669	+	19	41239473	+	7	30195808	-	7	29986274	-
915	rn3	3	82538635	+	3	82734785	-	16	69485873	-	16	69313058	+
916	rn3	X	113141303	+	X	113203238	+	X	141759347	+	X	141803470	+
918	hg18,rheMac2	3	77974862	+	3	77974862	-	16	73462959	+	16	73592730	+
920	rheMac2	9	24414654	+	9	24543803	+	4	91504331	+	4	91651920	+
926	rn3	5	54071201	+	5	53686103	-	13	114543157	-	13	114881002	+
928	mm8,rn3	2	10211413	+	2	10486581	+	12	17582916	+	12	17580944	-
929	hg18,rheMac2	16	20628094	+	16	20420033	-	7	119487782	+	7	119390507	-
931	rn3	2	135326494	-	2	135563792	-	1	129566516	-	1	129715776	-
934	mm8,rn3	3	27533804	+	3	63989167	-	14	13421679	+	14	12914674	-
935	rn3	15	84277549	+	15	84644281	-	7	75906858	+	7	76325805	-
936	hg18,rheMac2	11	55654104	+	11	55654104	-	2	85998614	+	2	86778643	+
938	mm8	5	41609337	-	5	41679276	-	15	4251184	+	15	4246102	-
941	rn3	7	67084104	+	7	66944304	-	5	133965454	-	5	134045855	+
942	rn3	22	25968813	-	22	26117010	-	5	112029981	+	5	111932065	+
943	rn3	X	146993466	+	X	147310396	+	X	65176553	+	X	65542893	+
944	rheMac2	13	104247961	-	13	104558479	-	8	6812778	-	8	7151079	-
946	rn3	12	6166726	+	12	5597288	-	6	125469784	-	6	125943324	+
951	rheMac2	14	72293413	-	16	62967891	-	12	84244940	-	8	104840463	-
952	mm8,rn3	6	166732044	-	6	167479728	-	17	8109829	+	17	8096419	-
956	rn3	3	98733739	+	3	101417334	-	16	59858427	-	16	57184375	+
959	rn3	1	87381174	-	1	87623021	-	3	144327085	+	3	144092318	+
962	rn3	X	120528063	+	X	120817109	-	X	36114134	+	X	36449088	-
965	rn3	20	7249847	-	20	7368506	-	2	133743271	-	2	133826975	-
971	rn3	4	33270634	-	4	33412885	-	5	60774632	-	5	60903559	-
973	rn3	13	94566880	+	13	94095526	-	14	117437711	+	14	117066263	-
974	rn3	4	25694948	-	4	26046591	-	5	53697155	-	5	53946076	-
976	rn3	4	166586775	+	4	166714799	+	8	67531280	-	8	67415353	-
979	rn3	12	6323848	+	12	6166726	-	6	125313641	-	6	125470164	+
981	rn3	3	160053486	+	3	159534935	-	3	67723416	+	3	67289635	-
982	rn3	10	67337756	+	10	67231033	-	10	64411531	-	10	64499929	+
983	mm8,rn3	9	130108958	+	9	133403025	+	2	29599508	+	2	29574378	-
987	rn3	6	76120771	+	6	76342475	+	9	79640026	+	9	79851809	+
989	rn3	3	190979455	+	3	190922885	-	16	25706979	+	16	25668907	-
992	hg18,rheMac2	15	97384559	+	15	97384559	-	7	67709282	-	7	68155482	-
993	rn3	2	85468560	+	2	85343919	-	6	72498959	-	6	72599840	+
997	rn3	5	41789148	+	5	41106265	-	15	4088061	-	15	4846808	+
999	rn3	5	148008946	+	5	147924264	-	18	62455303	-	18	62522194	+
1001	mm8,rn3	4	89219899	+	4	89652992	+	6	58628452	-	6	58740741	+
1002	rn3	15	43322975	+	15	43404541	+	2	122177637	+	2	122264599	+
1003	rn3	5	52174065	+	5	51603537	-	13	116174679	-	13	116628322	+
1004	rn3	5	107133789	-	5	107209405	-	17	62654341	-	17	62734005	-
1005	rn3	12	72230497	-	12	72537903	-	10	113055951	+	10	112831421	+
1007	mm8,rn3	9	122547313	+	9	127002119	+	2	34626996	+	2	34621917	-
1009	rn3	18	55063868	+	18	56075364	+	18	66047817	+	18	66887191	+
1011	rn3	14	99962299	-	14	100123039	-	12	109387957	-	12	109515770	-
1012	mm8,rn3	3	150482166	+	13	33343447	+	3	57338175	+	3	57260952	-
1014	mm8	X	114444432	+	X	8932519	-	X	72441147	-	X	73113045	+
1015	rn3	4	189422800	+	4	189865187	-	8	44486042	-	8	44052648	+
1017	mm8,rn3	2	113403396	+	2	138379088	+	2	23991749	+	2	23872156	-
1019	rn3	13	37702263	+	13	37555064	-	3	54023638	-	3	54102127	+
1022	rn3	2	13237329	+	2	13432687	+	12	15447477	-	12	15287704	-
1025	rn3	5	87161151	+	5	87618590	+	13	85170179	-	13	84676395	-
1027	hg18,rheMac2	22	46251262	+	22	46251262	-	15	86540380	+	15	86449170	+
1028	hg18,rheMac2	7	65097682	+	7	65097682	-	5	130332083	-	5	130287650	-
1030	rn3	2	194888941	+	2	195312317	-	1	48459958	-	1	47887115	+
1031	rn3	8	129070890	+	8	129297460	+	15	62005426	+	15	62196054	+
1032	rn3	14	41041318	-	14	41341422	-	12	62342946	-	12	62615752	-
1033	rn3	11	24445684	+	11	23274351	-	7	54674317	+	7	53897835	-
1037	rn3	14	37266162	+	14	37077703	-	12	58569677	+	12	58403345	-
1038	rn3	6	54245148	-	6	54382713	-	9	76875648	+	9	76719687	+
1039	mm8,rn3	7	156889571	+	7	22495647	-	12	117720384	-	12	117845507	+
1042	mm8,rn3	8	36803102	-	8	42781321	-	8	29098983	+	8	28889144	-
1049	rn3	2	222221077	+	2	222410121	+	1	77475216	+	1	77655913	+
1051	rn3	5	87161151	-	5	87618590	-	13	85170261	+	13	84687213	+
1055	rn3	15	84644281	+	15	84762645	+	7	76335430	+	7	76479681	+
1056	hg18,rheMac2	6	161016247	+	6	160797547	-	17	12214926	+	17	12259490	+
1061	rn3	13	94095526	+	13	94651034	-	14	117071625	+	14	117503721	-
1063	mm8,rn3	2	108200757	-	3	20856281	-	17	53536010	+	17	53156333	-
1066	rn3	13	43426084	+	13	43315501	-	14	75701955	-	14	75841170	+
1067	rn3	X	125863185	+	X	107268471	-	X	41409199	+	X	136342354	-
1068	mm8,rn3	16	18325683	-	11	17338325	-	7	116400868	+	7	116337593	-
1069	rn3	4	147206534	+	4	147438938	-	8	81829649	-	8	81588743	+
1070	rn3	10	71897472	+	10	71785421	-	10	60789478	-	10	60906429	+
1071	mm8	X	121982732	-	X	122038268	-	X	37474611	-	X	37483157	+
1072	rn3	4	92988061	+	4	94113150	-	6	62577803	+	6	63733583	-
1073	mm8,rn3	3	139807307	-	3	140091179	-	9	99048385	+	9	98975987	-
1079	rn3	8	4372420	-	8	4761557	-	8	17124056	-	8	17466997	-
1080	mm8,rn3	8	62947371	+	8	63135255	+	4	21056277	+	4	21050222	-
1081	rn3	6	101976236	+	6	101924290	-	10	49453022	-	10	49535876	+
1082	rn3	11	22372552	+	11	22436560	+	7	51557486	+	7	51610770	+
1086	rheMac2	4	48780315	-	4	86205701	-	5	73734296	-	5	102381094	-
1088	rn3	8	78439879	+	8	78330467	-	3	6063804	+	3	5922828	-
1090	rn3	5	35401119	+	5	38203988	-	15	9961649	-	15	7427252	+
1092	mm8	4	142404777	+	4	142482721	+	8	85524382	+	8	85516344	-
1095	rheMac2	11	82734268	+	11	82812249	+	7	92391641	-	7	92346846	-
1099	rn3	22	41519711	-	22	41875144	-	15	83080386	-	15	83383742	-
1100	rn3	2	13237329	-	2	13432687	-	12	15455562	+	12	15287915	+
1101	rn3	10	71785421	+	10	70825797	-	10	60898465	-	10	61669791	+
1102	rn3	5	107133789	+	5	107209405	+	17	62654341	+	17	62734005	+
1103	mm8,rn3	3	107868557	-	3	107933904	-	16	51206240	+	16	51178218	-
1104	rheMac2	18	10650522	+	18	12173183	+	18	63135237	+	18	67453911	+
1106	rn3	5	116539169	-	5	116728611	-	18	48107905	-	18	48317789	-
1107	rn3	4	189516911	+	4	190187124	-	8	44404625	-	8	43801136	+
1108	rn3	9	8298443	-	9	8530977	-	4	75394586	-	4	75625233	-
1109	rn3	18	56178265	+	18	56075364	-	18	66975700	+	18	66887191	-
1110	rn3	7	80040343	+	4	33817370	-	5	17417602	-	5	61341334	-
1111	rheMac2	9	91668172	-	9	129940495	-	13	52042467	-	2	32217188	+
1112	hg18	7	5856459	+	7	5802255	-	5	144280608	-	5	143378345	-
1113	mm8,rn3	4	95497922	-	4	122437986	-	6	65103223	-	6	65394459	+
1114	rn3	15	68648133	+	15	68459165	-	9	60752395	-	9	60917893	+
1115	rn3	6	42511741	+	6	43194540	+	17	46621105	-	17	46062320	-
1116	rn3	17	11575456	+	17	11924874	+	11	65865903	-	11	65551994	-
1117	rn3	19	50339152	+	19	50592583	-	7	18691968	-	7	18528161	+
1118	rn3	4	37042235	-	4	37391189	-	5	64028391	-	5	64261357	-
1119	mm8,rn3	6	52722372	-	6	74068693	-	1	21283375	-	1	21376018	+
1120	rn3	10	53054992	+	10	52998050	-	19	31228054	-	19	31270613	+
1121	hg18,rheMac2	17	6712290	+	17	6693753	-	11	70141620	-	11	72188095	-
1122	hg18	1	143629630	+	1	120151503	-	3	97840367	+	3	98311437	+
1124	rheMac2	2	110348650	-	2	111174745	-	2	127484511	-	2	127524147	-
1127	rn3	16	13256649	+	16	13000186	-	16	12208151	+	16	11978339	-
1129	rn3	11	7538031	-	11	7594485	-	7	107441090	-	7	107495958	-
1138	hg18,rheMac2	5	117081588	+	5	117081588	-	18	48949787	-	18	48738946	-
1141	rn3	7	96269751	+	7	96155710	-	6	6623239	+	6	6508054	-
1142	rheMac2	18	5667160	-	18	5805083	-	17	68937933	+	17	68821495	+
1143	rn3	1	60442857	-	1	60545166	-	4	96427790	-	4	96546988	-
1145	mm8,rn3	3	38155271	-	3	38341656	-	9	119007711	-	9	118996536	+
1148	rheMac2	7	118717084	+	7	119226071	+	6	20124498	+	6	20627949	+
1151	mm8,rn3	X	118879305	+	X	119188506	+	X	33625111	-	X	34396279	+
1152	rn3	4	37042235	+	4	37391189	+	5	64033579	+	5	64264663	+
1153	rn3	4	189908674	+	4	190201164	+	8	44024084	-	8	43784670	-
1154	rn3	17	59554892	-	17	59702822	-	11	106298262	-	11	106438890	-
1157	rn3	12	21923087	+	12	23665696	-	6	142615215	+	6	143879944	-
1163	hg18	13	113474720	+	13	113373993	-	8	13496143	-	8	13409417	-
1164	rn3	13	38080153	+	13	39307522	-	3	53799494	-	3	53018478	+
1165	rn3	1	60442857	+	1	60342580	-	4	96427790	+	4	96300227	-
1167	rn3	11	7888531	+	11	8071842	+	7	108659224	+	7	108813557	+
1169	mm8,rn3	7	107559441	+	14	24223817	+	12	45482296	-	12	45508375	+
1172	hg18	16	68759147	+	16	68534470	-	8	113969616	-	8	110448104	-
1176	rn3	20	40753985	+	20	40829316	+	2	161861860	+	2	161942535	+
1177	hg18,rheMac2	13	24453166	+	13	24408952	-	14	59450143	-	14	55527536	-
1178	rn3	21	35665080	+	21	35864081	-	16	92999724	+	16	93138944	-
1179	rn3	3	29151448	-	3	43853770	-	9	117258607	+	9	122315397	-
1182	rn3	9	23098375	-	9	23321694	-	4	90045584	-	4	90299501	-
1183	rn3	1	74077350	-	1	74238780	-	3	155308617	+	3	155167536	+
1187	mm8,rn3	1	233383517	-	10	35264624	-	8	129848646	-	8	129921474	+
1190	rn3	12	104530702	+	12	104403289	-	10	83385440	+	10	83299771	-
1192	rn3	13	26896730	+	13	27377916	+	5	147259004	+	5	147570964	+
1193	rn3	7	68550259	+	7	69138457	+	5	132933734	-	5	132411824	-
1195	rn3	9	108732873	+	9	108553384	-	4	55036085	+	4	54853025	-
1196	mm8	21	44076333	+	19	15110227	-	10	77765838	-	10	77968735	+
1197	mm8,rn3	4	141442884	+	19	14694052	-	8	86355772	-	8	86456741	+
1198	hg18	17	41997758	+	17	41722024	-	11	103793761	-	11	104297202	-
1199	rn3	20	57535548	+	20	57196359	-	2	178044426	+	2	174280584	-
1202	mm8,rn3	3	107868557	+	3	107938144	+	16	51082172	+	16	51039898	-
1207	hg18,rheMac2	17	1185126	+	17	1185126	-	11	75582449	-	11	76536319	-
1208	rn3	3	74852697	+	3	74929009	+	6	102692066	+	6	102807463	+
1209	mm8	X	42740855	-	X	42808379	-	X	14578764	-	X	14730172	+
1212	mm8,rn3	7	91358984	+	7	91607723	+	5	3912572	+	5	3872673	-
1213	rn3	13	60225406	-	13	60448687	-	14	86581391	-	14	86881702	-
1215	rn3	9	139612423	+	9	139449330	-	2	24768876	-	2	24907017	+
1217	rn3	5	100162152	+	5	100230877	+	1	97408650	+	1	97468438	+
1218	rn3	19	50592583	+	19	50541443	-	7	18527492	-	7	18557554	+
1219	rn3	8	125619829	-	8	125918550	-	15	58762987	-	15	59020792	-
1222	rheMac2	19	35087785	+	3	78348835	+	7	37746873	-	16	73218180	-
1223	rn3	11	41965752	-	11	42128445	-	2	95694813	+	2	95472151	+
1225	rn3	18	25754035	+	18	25942952	+	18	18806097	+	18	19074752	+
1226	rn3	4	18133956	-	4	18355445	-	5	46542657	-	5	46786531	-
1228	mm8,rn3	15	76166419	+	15	49739443	-	9	54326567	+	9	54326198	-
1229	rn3	5	62088171	+	5	62484907	+	13	107745744	-	13	107371629	-
1231	mm8,rn3	15	76166419	-	3	149704943	-	9	90078401	-	9	90111680	+
1232	rn3	21	35727095	+	21	35665080	-	16	93045807	+	16	92999724	-
1238	hg18,rheMac2	7	5002587	+	7	4972780	-	5	143470189	-	5	142865591	-
1239	rn3	22	41519711	+	22	41875144	+	15	83127465	+	15	83392009	+
1240	rn3	22	25837219	+	22	26117010	+	5	112112405	-	5	111929149	-
1243	rn3	8	78330467	+	8	78834591	-	3	5939303	+	3	6516402	-
1244	rn3	X	150760722	-	X	150823466	-	X	68415362	-	X	68464227	-
1248	mm8,rn3	20	1706750	+	2	113403396	-	2	129163710	+	2	129105931	-
1249	rn3	15	84345333	+	15	84762645	-	7	76015046	+	7	76479681	-
1255	rn3	18	55501530	+	18	56178265	-	18	66400972	+	18	66971762	-
1258	rn3	3	88998754	+	3	89055495	+	16	64038259	-	16	64000419	-
1260	rn3	8	58523957	+	8	58592946	+	4	4909641	+	4	5041670	+
1261	mm8,rn3	X	130392571	+	X	130563328	+	X	46582196	-	X	46711471	+
1262	rn3	1	175041764	+	1	174941736	-	1	160582243	-	1	160678587	+
1264	rn3	7	30622774	+	7	30770711	+	6	54994473	+	6	55128675	+
1268	hg18,rheMac2	15	76017679	+	15	76017679	-	9	89979879	+	9	56692509	-
1269	hg18	11	71302752	+	11	70903217	-	7	101951804	-	7	143604460	+
1270	mm8,rn3	3	149897895	+	3	179603919	-	3	20558770	-	3	20779204	+
1272	rn3	12	60297784	+	12	60174484	-	10	123184200	-	10	123285528	+
1274	rn3	8	84577532	-	8	84787700	-	3	12618838	-	3	12927910	-
1275	rn3	5	54178612	+	5	54071201	-	13	114456641	-	13	114543390	+
1276	rn3	10	67154270	+	10	67337756	-	10	64572804	-	10	64411565	+
1277	mm8,rn3	19	224009	+	19	14878941	+	10	78930081	+	10	78254361	-
1278	rheMac2	9	129942911	+	9	126697280	-	2	32215275	-	2	38849395	-
1281	rn3	3	68398148	-	3	68706242	-	6	96343885	-	6	96639070	-
1282	rn3	6	108733977	+	6	107754950	-	10	42148962	-	10	42994635	+
1286	rheMac2	6	58195618	-	6	62185964	-	1	32872447	+	1	32741849	+
1287	rn3	15	90773617	-	15	90852688	-	7	73850848	+	7	73775603	+
1290	mm8	9	26053281	-	9	26137661	-	4	93194340	-	4	93202187	+
1291	hg18	7	2678926	+	7	2677923	-	5	140975948	+	5	140873038	+
1292	rn3	4	115211409	+	4	115112499	-	3	126285336	-	3	126363564	+
1295	mm8,rn3	19	12201489	-	7	36476389	-	9	21882365	-	9	22081293	+
1296	rheMac2	2	3035258	+	2	4983316	-	12	29556971	-	12	28494576	+
1301	rn3	10	87060671	+	10	87246294	+	14	34838629	-	14	34595229	-
1303	rn3	3	145317932	+	3	145425082	+	9	94205344	-	9	94089033	-
1304	rn3	X	147115134	+	X	146933990	-	X	65352673	+	X	65096750	-
1305	rn3	10	87030090	-	10	87217675	-	14	34935387	+	14	34674261	+
1309	rn3	14	36969635	+	14	37266162	-	12	58342887	+	12	58569677	-
1310	mm8	18	69123591	+	18	69196668	+	18	85927010	+	18	85916498	-
1312	rn3	1	74368511	-	1	74559776	-	3	155061736	+	3	154926027	+
1313	rn3	8	78834591	+	8	78439879	-	3	6528346	+	3	6016922	-
1316	mm8	1	69682848	-	1	69752832	-	3	158612276	+	3	158611903	-
1321	rn3	12	84390709	-	12	84463619	-	10	102264497	+	10	102197401	+
1322	rn3	2	161851930	-	2	162034248	-	2	61495420	-	2	61696006	-
1323	mm8,rn3	8	50488422	+	8	67478392	+	1	9294611	-	1	9508119	+
1325	rheMac2	1	47013916	-	1	47296766	-	4	115200060	+	4	114604165	+
1326	rn3	5	86206745	+	5	86013891	-	13	86228114	-	13	86457323	+
1327	rn3	1	78225022	+	1	78327680	+	3	152142045	-	3	152069544	-
1328	rn3	6	107754950	+	6	107650471	-	10	42992749	-	10	43074758	+
1330	rn3	18	32656864	+	18	32838357	+	18	25310458	+	18	25442127	+
1331	rn3	20	7249847	+	20	7368506	+	2	133748309	+	2	133831057	+
1332	mm8	16	161186	+	5	171872669	+	17	26016539	-	17	26061396	+
1333	rn3	3	123277885	-	3	123521343	-	16	36563376	+	16	36383251	+
1334	mm8,rn3	9	6740667	+	9	84959637	+	4	73767795	+	4	73674555	-
1337	rn3	7	86393571	-	7	87675881	-	5	9434210	+	5	8070484	+
1338	rn3	11	39139093	+	11	39310556	+	2	98546084	-	2	98342732	-
1343	mm8,rn3	X	118879305	-	X	119055708	-	X	33542809	-	X	33557652	+
1344	rn3	7	20140768	+	7	19998185	-	12	119913294	-	12	120170693	+
1345	rheMac2	14	72235289	+	16	62967891	+	12	84218191	+	8	104840463	+
1346	rn3	4	175833636	-	4	176010455	-	8	58982251	+	8	58823432	+
1347	rn3	15	84162359	-	15	84277549	-	7	75642461	-	7	75906858	-
1351	rn3	6	153936705	-	6	154158052	-	10	4045547	+	10	3804528	+
1353	mm8	11	97257666	+	11	97570690	+	9	11542484	+	9	11527515	-
1356	rn3	12	60174484	+	12	62974517	+	10	123285526	-	10	121079146	-
1357	rn3	3	7120864	-	3	7376585	-	6	110836831	-	6	111085259	-
1359	rn3	3	27890515	+	3	28004307	+	9	118252096	-	9	118174160	-
1363	mm8	6	65083250	+	6	65149523	+	1	30020101	+	1	30019595	-
1364	hg18,rheMac2	18	1353400	+	18	1353400	-	17	93888830	+	17	93725002	+
1365	rn3	12	5597288	+	12	6323848	-	6	125943324	-	6	125313648	+
1367	rn3	16	13978676	+	16	15549097	+	16	13102713	+	16	13984585	+
1369	rheMac2	5	162335073	+	5	162211558	-	11	41069006	-	11	41171523	+
1370	hg18,rheMac2	13	54180547	+	13	54180547	-	14	80568149	-	14	80504358	-
1371	rn3	10	53054992	-	10	89965488	-	19	31229044	+	19	33133215	-
1372	rn3	10	99096085	-	10	101554766	-	19	41904794	-	19	43861235	-
1376	rn3	15	68742346	+	15	68648133	-	9	60672201	-	9	60752395	+
1378	mm8,rn3	19	46656795	-	19	47704970	-	7	25320202	+	7	25172371	-
1382	rn3	16	50832049	-	16	50952577	-	8	92930791	-	8	93055368	-
1383	mm8,rn3	2	127448971	+	5	110199472	+	18	32578945	-	18	32836181	+
1385	rn3	2	183369765	+	2	183634437	-	2	80172242	+	2	80398096	-
1387	hg18	X	16255856	+	X	16249694	-	X	158638911	-	X	158740290	-
1391	mm8	X	37499718	-	X	37571780	-	X	8496022	-	X	8568333	+
1392	rn3	12	83231727	+	12	83521388	+	10	103509607	-	10	103235491	-
1393	rn3	6	19085975	+	6	18949929	-	13	47663669	+	13	47567421	-
1397	rheMac2	14	72293493	+	14	72234622	-	12	84245149	+	12	84218189	-
1398	mm8,rn3	6	115279134	+	6	115381761	+	10	35423522	+	10	35421815	-
1399	hg18	17	42535474	+	17	42449869	-	11	104312178	+	11	103437200	+
1402	hg18,rheMac2	X	73533527	+	X	73512595	-	X	100032076	-	X	99893357	-
1405	rn3	7	122719176	+	7	123094240	-	6	24214407	+	6	24558027	-
1406	hg18,rheMac2	11	55827599	+	11	55808144	-	2	86032440	-	2	86606892	+
1410	mm8,rn3	4	122437986	+	3	184313380	-	3	36367487	+	3	36194850	-
1411	rn3	5	129929916	+	5	130171904	+	18	59895548	+	18	60068393	+
1412	hg18	16	21477567	+	16	21261364	-	7	120794572	+	7	120134876	-
1413	mm8	8	73523235	+	8	73602956	+	1	15240491	-	1	15253238	+
1414	rn3	2	135326494	+	2	135563792	+	1	129566516	+	1	129716237	+
1417	hg18,rheMac2	13	54264367	+	13	54264367	-	14	80582821	+	14	80504349	+
1423	rn3	1	31073570	-	1	31443988	-	4	130131913	+	4	129932029	+
1424	rn3	8	74721253	-	8	75067892	-	1	16398640	-	1	16675097	-
1425	rn3	X	12664470	+	X	12276025	-	X	162799382	-	X	163234745	+
1426	rn3	6	42631959	+	6	42347174	-	17	46474299	-	17	46776894	+
1431	rn3	14	41041318	+	14	41341422	+	12	62342946	+	12	62615752	+
1434	rn3	10	94740132	+	10	94879255	+	19	37695422	+	19	37801962	+
1436	rn3	4	19511024	-	4	19586834	-	5	47918080	-	5	47996882	-
1442	hg18	5	99764823	+	5	99690847	-	1	97043724	+	1	96452694	+
1450	hg18,rheMac2	15	30689539	+	15	30483716	-	2	113650313	-	7	62857070	+
1453	mm8,rn3	5	98413294	-	6	170759180	-	17	15307429	+	17	15232307	-
1455	mm8,rn3	1	58839121	-	1	67389613	-	4	102811413	+	4	102797179	-
1459	mm8,rn3	19	17689692	-	19	17825730	-	8	74600837	-	8	74605344	+
1462	mm8,rn3	8	135134472	+	8	135301480	+	15	67634879	-	15	67640334	+
1464	mm8,rn3	13	22330465	-	13	49075641	-	14	58062771	-	14	58153992	+
1465	rn3	2	85089316	+	2	85468560	-	6	72799000	-	6	72503851	+
1467	rn3	X	120615303	+	X	120528063	-	X	36266363	+	X	36101482	-
1470	rn3	X	121112810	-	X	121270953	-	X	36713381	-	X	36831156	-
1472	rn3	7	47733415	+	7	47866069	+	11	8688347	+	11	8804032	+
1473	mm8	X	121982732	+	X	122038268	+	X	37546144	-	X	37556121	+
1474	mm8,rn3	7	55342646	+	4	89652992	-	6	57631442	+	6	57592600	-
1479	rn3	10	113263695	-	10	113369634	-	19	54505347	-	19	54610675	-
1480	rn3	4	165892917	-	4	166382432	-	8	68067378	+	8	67741913	+
1481	mm8,rn3	14	51331356	+	6	39171889	+	14	18841398	-	14	18861066	+
1482	mm8,rn3	1	89679528	+	4	89219899	-	5	105634565	+	5	104746288	-
1483	hg18	13	44857737	+	13	44848650	-	14	74492696	+	14	74551923	+
1486	rn3	1	175846582	-	1	175930615	-	1	159754461	+	1	159658357	+
1487	hg18	17	41061728	+	17	40949470	-	11	103794698	+	11	103274389	-
1488	rheMac2	6	108413445	+	6	159271355	+	10	42414150	-	17	6733560	+
1490	mm8,rn3	1	104519998	+	1	104680978	+	3	112672640	+	3	112655245	-
1491	rn3	1	87461952	+	1	87623021	+	3	144245842	-	3	144092318	-
1492	hg18,rheMac2	12	8603697	+	12	8603697	-	6	122537489	-	6	123256496	-
1494	rn3	1	96379297	-	1	96661732	-	3	120274200	+	3	120045165	+
1497	rn3	9	93273759	-	9	93777027	-	13	53007593	-	13	53300201	-
1498	rn3	5	86013891	+	5	86288207	-	13	86457323	-	13	86131402	+
1502	rheMac2	18	66703913	+	18	67485082	+	18	88489553	-	18	87696419	-
1503	rn3	3	170520249	-	3	173197226	-	3	30375229	-	3	27924541	+
1504	hg18,rheMac2	17	4479650	+	17	4479339	-	11	70159869	+	11	72183005	+
1507	rn3	18	73862487	+	18	74601660	+	18	81858796	-	18	81304849	-
1511	rn3	18	29238442	+	18	29347325	+	18	22290463	+	18	22427738	+
1518	rn3	13	37555064	+	13	38080153	-	3	54098468	-	3	53799494	+
1519	mm8	4	150215216	+	4	150266812	+	8	79113144	+	8	79107482	-
1521	mm8	X	37499718	+	X	37638101	+	X	8669756	-	X	8886372	+
1523	rn3	5	61893299	-	5	62088171	-	13	107962442	+	13	107753938	+
1525	mm8,rn3	7	36319308	-	11	134348114	-	9	25354638	-	9	25823353	+
1528	rn3	17	60563984	+	17	64002679	-	11	109114226	-	11	109453990	-
1529	rn3	4	147349452	+	4	147438938	+	8	81678926	-	8	81588670	-
1532	hg18,rheMac2	6	63752140	+	6	63752140	-	1	31423062	+	1	31477516	+
1537	mm8,rn3	X	140834183	+	X	141069941	+	X	58750106	-	X	58823859	+
1539	rn3	6	54382713	+	6	54643880	+	9	76707582	-	9	76512235	-
1542	mm8,rn3	8	42589261	+	8	38063247	-	8	28818650	+	8	28746911	-
1543	hg18,rheMac2	13	23403236	+	13	23403236	-	14	59390237	+	14	59719262	+
1544	mm8,rn3	2	56505021	-	2	56640734	-	11	28267170	+	11	28247354	-
1550	rn3	11	34353692	+	11	34566835	+	2	103329806	-	2	103145789	-
1551	hg18	5	70782086	+	5	69460319	-	13	101207845	-	13	101284977	-
1552	rn3	6	64621951	+	6	64854157	+	1	30604664	-	1	30357414	-
1556	rn3	17	25087487	-	17	25432291	-	11	77181718	+	11	76932109	+
1557	hg18,rheMac2	5	117323351	+	5	117323351	-	18	48951313	+	18	48741864	+
1559	rn3	12	60297784	-	12	62974517	-	10	123189111	+	10	121079310	+
1561	rn3	X	150823466	+	X	151029613	+	X	68472480	+	X	68633487	+
1562	rn3	3	96085359	-	3	96545291	-	16	61941384	+	16	61604177	+
1566	rn3	11	33611817	-	11	33781172	-	2	103979114	+	2	103818091	+
1567	rheMac2	1	37897714	+	19	19507748	-	4	124468545	-	8	72817723	+
1568	rn3	4	147206534	-	4	147349452	-	8	81835827	+	8	81679378	+
1569	hg18	7	66159759	+	7	66159759	-	5	130576854	+	5	130559597	-
1572	rn3	7	108848056	+	7	109099238	+	12	44233722	-	12	44022250	-
1574	rn3	X	150569257	+	X	151029613	-	X	68187866	+	X	68626072	-
1575	hg18	6	122039302	+	6	122039302	-	10	56303376	+	10	56255602	+
1577	rn3	1	74176015	+	1	74238780	+	3	155209012	-	3	155167398	-
1581	rn3	4	165830407	+	4	166586775	-	8	68145610	-	8	67531280	+
1584	rn3	9	8298443	+	9	8530977	+	4	75410863	+	4	75625505	+
1585	mm8	1	69682848	+	1	69752832	+	3	158545992	+	3	158544955	-
1586	rn3	X	148221936	-	X	148456613	-	X	66456954	-	X	66656412	-
1591	mm8	4	142404777	-	4	142470142	-	8	85619930	+	8	85583620	-
1595	mm8,rn3	8	20228270	+	13	48708545	-	14	71132750	-	14	71263278	+
1596	rn3	13	40630628	-	13	52711678	-	14	78185504	+	14	78993227	-
1598	rheMac2	3	13966517	-	3	128299335	-	6	91387147	-	6	89256547	+
1599	rn3	3	95385663	+	3	95706285	+	16	62590537	-	16	62238328	-
1602	rheMac2	1	47234626	+	1	47396439	+	4	114632829	-	4	114600026	-
1605	rn3	X	127526053	-	X	127683698	-	X	42976618	-	X	43179065	-
1606	rn3	17	38393489	+	17	38319644	-	11	101246555	+	11	101195707	-
1608	mm8,rn3	5	119015982	+	5	119734693	-	18	50599115	-	18	50603670	+
1610	rn3	18	60193024	+	18	60345639	+	1	109935955	+	1	110101978	+
1611	rn3	2	183634437	+	2	183495301	-	2	80399403	+	2	80299747	-
1613	rn3	11	41965752	+	11	42384594	-	2	95693731	-	2	95253464	+
1619	hg18	9	38635377	+	9	38438825	-	13	64474228	+	4	45873114	-
1624	rn3	18	29238442	-	18	29347325	-	18	22290127	-	18	22408924	-
1625	rn3	13	94651034	+	13	94566880	-	14	117509171	+	14	117437711	-
1626	rn3	2	54381008	+	2	54922154	-	11	30407238	-	11	29761482	+
1627	rn3	16	78918980	+	16	79223188	+	8	119209252	+	8	119480930	+
1628	mm8	16	98927	-	5	171872669	-	11	32147376	-	11	32202763	+
1634	mm8,rn3	9	130101367	-	9	133403025	-	2	32084624	+	2	32082028	-
1635	rn3	10	65518466	-	10	65744586	-	10	65974640	+	10	65725279	+
1636	rn3	7	96058482	+	7	96269751	-	6	6408168	+	6	6623239	-
1637	rheMac2	11	1246083	+	11	1303033	+	7	141690953	+	7	141722115	+
1639	rn3	14	48941343	+	14	48862985	-	12	69892182	+	12	69798096	-
1641	rn3	2	115925360	-	2	116051546	-	1	125570648	+	1	125435167	+
1644	rn3	X	140631060	-	X	140736782	-	X	58356843	-	X	58489854	-
1645	hg18	16	21867614	+	16	21716463	-	7	120423718	+	7	120986338	-
1646	mm8,rn3	15	78055773	-	6	87130874	-	9	88994401	+	9	88282630	-
1648	hg18,rheMac2	18	1138203	+	18	1138203	-	17	93885558	-	17	93716333	-
1649	rn3	16	82190001	+	16	82102731	-	8	122079867	+	8	122005087	-
1650	rn3	4	166279364	+	4	166714799	-	8	67864715	-	8	67416710	+
1651	mm8,rn3	13	22462350	+	13	49075641	+	14	60179461	-	14	60260674	+
1653	rn3	6	23774110	+	6	24051462	+	13	25727415	-	13	25476160	-
1657	rn3	4	25694948	+	4	26046591	+	5	53697155	+	5	53946115	+
1659	rn3	11	21891319	+	11	21800017	-	7	51116744	+	7	51008392	-
1663	hg18,rheMac2	15	26996735	+	15	26247662	-	7	64429973	+	7	55917967	+
1666	rn3	11	20735835	+	11	21891319	-	7	49898076	+	7	51116129	-
1667	mm8,rn3	4	161463652	+	4	161668897	+	3	77805809	+	3	77767739	-
1668	hg18,rheMac2	2	184349993	+	2	184349993	-	2	81073770	+	2	80819255	+
1669	rn3	13	58942830	+	13	59135619	+	14	85293058	+	14	85485918	+
1671	rn3	1	90469375	+	1	90879857	-	5	106317322	+	5	106633610	-
1673	hg18	13	44928451	+	13	44928444	-	14	74489239	-	14	74551029	-
1675	rn3	5	35656216	+	5	35401119	-	15	9691631	-	15	9961649	+
1677	rn3	X	127526053	+	X	127683698	+	X	42976618	+	X	43179065	+
1681	mm8,rn3	2	56505021	+	2	56661319	+	11	28076036	+	11	28050307	-
1684	mm8,rn3	22	27491722	+	7	43722561	+	11	5443584	-	11	5604320	+
1685	rn3	3	82734785	+	3	82610784	-	16	69308922	-	16	69416823	+
1687	rn3	10	116456773	+	10	116140948	-	19	57311740	+	19	57048676	-
1688	rn3	4	188910444	+	4	189038872	+	8	44986342	-	8	44912104	-
1692	mm8,rn3	8	62864328	-	8	97312159	-	4	9678134	-	4	9704277	+
1694	hg18	5	98946181	+	5	98831363	-	1	96910169	-	1	96450338	-
1695	rn3	2	161851930	+	2	162081142	+	2	61497778	+	2	61734992	+
1696	rn3	20	57723969	+	20	57535548	-	2	178164818	+	2	174557478	-
1700	hg18,rheMac2	15	21262586	+	15	20640009	-	7	62303341	-	7	55866959	-
1701	rn3	5	61893299	+	5	62231764	-	13	107961923	-	13	107629674	+
1704	rn3	X	12928015	+	X	12664470	-	X	162526363	-	X	162799382	+
1706	hg18,rheMac2	6	161226588	+	6	161193218	-	17	12215353	-	17	12268116	-
1707	hg18	9	99077408	+	9	98666783	-	4	45889182	+	13	64326802	-
1708	rn3	X	47288101	+	X	47361212	+	X	19999510	+	X	20074957	+
1709	rn3	5	41106265	+	5	41980150	-	15	4846808	-	15	3914935	+
1710	hg18,rheMac2	12	119996740	+	12	119996740	-	5	122886853	+	5	115183915	+
1711	mm8,rn3	1	104519998	-	1	104680978	-	3	112830552	+	3	112819310	-
1717	hg18,rheMac2	X	73693943	+	X	73628542	-	X	100140199	+	X	99948595	+
1719	rn3	7	68550259	-	7	69138457	-	5	132933734	+	5	132412790	+
1720	mm8,rn3	4	151148805	+	1	156510162	-	3	87049007	-	3	87081638	+
1723	rn3	14	43213980	+	14	43491618	+	12	64480733	+	12	64820865	+
1724	rn3	4	166385607	+	4	166279364	-	8	67691910	-	8	67866805	+
1726	rn3	3	88998754	-	3	89055495	-	16	64038661	+	16	64000419	+
1730	rn3	19	50541443	+	19	50225832	-	7	18557554	-	7	18772292	+
1732	rheMac2	19	51011634	+	9	126799049	-	7	18212109	-	2	38918526	-
1733	rn3	5	86288207	+	5	86206745	-	13	86119816	-	13	86228114	+
1736	mm8,rn3	5	119213955	+	5	119734693	+	18	51143588	-	18	51152732	+
1738	mm8,rn3	13	48708545	+	13	25576704	-	14	58552126	-	14	58558131	+
1740	rn3	1	46475576	+	1	46732104	+	4	115622534	-	4	115434122	-
1741	hg18,rheMac2	10	29746845	+	10	29746845	-	18	5126415	-	18	4238725	-
1744	mm8,rn3	2	51558013	+	2	51924262	+	17	91889481	-	17	91897793	+
1745	rn3	7	20032783	+	7	20194665	-	12	120089849	-	12	119860337	+
1746	rn3	4	115112499	+	4	115055015	-	3	126363564	-	3	126419552	+
1750	rn3	15	54850462	+	15	55136774	+	9	72015429	-	9	71820186	-
1751	rheMac2	10	98562506	+	5	162335073	-	19	41533756	+	11	41076302	+
1753	rn3	6	42423948	+	6	43022028	-	17	46710127	-	17	46197219	+
1755	rn3	17	635601	-	17	24711968	-	11	76061636	-	11	77459879	+
1756	mm8,rn3	13	75633060	+	13	75739296	+	14	101142183	-	14	101184197	+
1757	rn3	5	65217682	-	5	65666010	-	13	105087302	+	13	104735907	+
1761	mm8	6	159379564	+	6	167312281	+	17	7770131	-	17	7998320	+
1763	mm8	5	101794161	-	5	102771761	-	1	98711338	-	1	99368748	+
1764	rn3	2	22676574	+	2	22843365	+	12	6290147	-	12	6083903	-
1767	rn3	10	99096085	+	10	102093137	-	19	41910088	+	19	44251562	-
1769	rn3	7	12125309	-	7	12268242	-	6	12926766	-	6	13053411	-
1771	mm8,rn3	2	68558385	-	7	55342646	-	11	16851091	+	11	16847264	-
1773	rn3	X	12276025	+	X	12928015	-	X	163234745	-	X	162526363	+
1775	rn3	6	153936705	+	6	154158052	+	10	4044584	-	10	3803668	-
1778	rn3	8	74721253	+	8	75067892	+	1	16413582	+	1	16676794	+
1783	rheMac2	2	5083316	+	2	3507158	-	12	28434522	-	12	29257868	+
1784	rn3	9	23098375	+	9	23321694	+	4	90045724	+	4	90321677	+
1785	rn3	13	26896730	-	13	27377916	-	5	147259004	-	5	147569173	-
1789	rn3	13	43315501	+	13	42896467	-	14	75831692	-	14	76232427	+
1790	mm8	8	73523235	-	8	73602956	-	1	15139986	-	1	15153151	+
1791	rn3	17	59554892	+	17	59702822	+	11	106298877	+	11	106438890	+
1793	rn3	9	108197057	+	9	108732873	-	4	54452129	+	4	55036085	-
1797	mm8,rn3	12	87188203	-	12	87263183	-	10	99831274	+	10	99726558	-
1798	mm8,rn3	7	33102649	+	7	36319308	+	9	22225946	+	9	22196416	-
1800	rn3	3	68398148	+	3	68706242	+	6	96343885	+	6	96639070	+
1801	mm8,rn3	6	112978445	+	6	113111776	+	10	38055035	+	10	38050191	-
1803	rn3	9	20422015	-	9	20728181	-	4	87321098	-	4	87622785	-
1804	rn3	6	101924290	+	6	103303153	-	10	49535876	-	10	47947618	+
1809	rn3	10	101813682	+	10	102146036	+	19	44022118	+	19	44507598	+
1810	mm8,rn3	3	38156780	+	3	38345401	+	9	119186981	-	9	119200234	+
1812	mm8,rn3	2	4140143	+	2	4248841	+	12	28927361	+	12	28920897	-
1816	rn3	13	40774079	+	13	40505159	-	14	78127962	-	14	78240865	+
1817	rheMac2	3	164302408	+	3	164359047	+	3	71638915	+	3	71662239	+
1818	hg18	10	51587595	+	10	51389408	-	19	32034639	+	14	31097751	-
1820	rn3	5	100162152	-	5	100230877	-	1	97403953	-	1	97467924	-
1821	hg18	7	66418335	+	7	66376747	-	5	134352891	-	5	130620310	-
1825	hg18	13	113758051	+	13	113658050	-	8	13562091	+	8	13450643	+
1826	rn3	1	60342580	+	1	60545166	+	4	96300785	+	4	96554853	+
1830	rn3	11	22372552	-	11	22436560	-	7	51554311	-	7	51609829	-
1831	rn3	7	86795550	-	7	87319559	-	5	9048164	+	5	8446063	+
1837	rn3	1	96379297	+	1	96661732	+	3	120274123	-	3	120045165	-
1838	rn3	X	121112810	+	X	121270953	+	X	36720306	+	X	36831156	+
1840	rn3	2	54343886	-	2	54477850	-	11	30431775	+	11	30254452	+
1841	rn3	17	11575456	-	17	11924874	-	11	65865903	+	11	65551994	+
1843	rn3	13	42896467	+	13	43426084	-	14	76232427	-	14	75703378	+
1846	rn3	10	65518466	+	10	65744586	+	10	65974640	-	10	65719103	-
1849	rn3	1	106807391	-	1	107045933	-	3	111036638	+	3	110774148	+
1853	hg18,rheMac2	4	165637915	+	4	165636161	-	8	68208289	+	8	68359940	+
1854	mm8,rn3	16	18325683	+	11	17338325	+	7	45952260	-	7	45963214	+
1856	rheMac2	18	5667160	+	18	5805083	+	17	68937933	-	17	68819445	-
1857	mm8,rn3	7	23216929	+	7	150193080	-	6	48940633	+	6	48838535	-
1858	hg18	7	72340555	+	7	71954749	-	5	135669612	-	5	130530405	+
1859	hg18	10	52170929	+	10	52085223	-	19	32073274	-	19	32470073	-
1863	hg18,rheMac2	8	5744107	+	8	5744107	-	8	18206491	+	8	17848349	+
1865	rn3	6	54245148	+	6	54643880	-	9	76858092	-	9	76512235	+
1868	hg18	22	20176051	+	22	19686704	-	16	17168891	-	16	17444766	-
1869	mm8,rn3	4	121110741	+	1	68226750	-	6	66471782	-	6	66807616	+
1876	rn3	11	33876355	+	11	33692088	-	2	103742035	-	2	103914783	+
1877	mm8,rn3	7	111924708	+	7	12515738	-	6	13234802	+	6	13231238	-
1878	rn3	13	39117653	+	13	37702263	-	3	53105909	-	3	54024029	+
1880	rn3	2	18097079	+	2	18379522	+	12	10990957	-	12	10665571	-
1884	mm8,rn3	9	83216628	-	9	83286956	-	4	71353060	-	4	71358078	+
1885	hg18,rheMac2	15	96897203	+	15	96897203	-	7	67709337	+	7	68155478	+
